# Supplementary material for: Features of smaller ribosomes in candidate phyla radiation (CPR) bacteria revealed with a molecular evolutionary analysis
Source: PubMed Central journal article supplement — RNA. 2022 Aug;28(8):1041–57. doi: 10.1261/rna.079103.122 (PMC9297842; doi:10.1261/rna.079103.122), 2022-08
Supplement: supp_079103.122_Supplemental_Material.pdf [file supp_079103.122_Supplemental_Material.pdf]

# Supplementary information

## Features of smaller ribosomes in Candidate Phyla Radiation (CPR) bacteria revealed with a molecular evolutionary analysis

Megumi Tsurumaki<sup>1,2</sup>, Motofumi Saito<sup>1,2</sup>, Masaru Tomita<sup>1,2,3</sup>, and Akio Kanai<sup>1,2,3\*</sup>

<sup>1</sup>Institute for Advanced Biosciences, Keio University, Tsuruoka 997-0017, Japan

<sup>2</sup>Systems Biology Program, Graduate School of Media and Governance, Keio University, Fujisawa 252-0882, Japan

<sup>3</sup>Faculty of Environment and Information Studies, Keio University, Fujisawa 252-0882, Japan

\*Corresponding Author

Akio Kanai, PhD

Institute for Advanced Biosciences, Keio University

Tsuruoka, Yamagata 997-0017, Japan

Tel: +81-235-29-0524

Fax: +81-235-29-0525

E-mail: [akio@sfc.keio.ac.jp](mailto:akio@sfc.keio.ac.jp)

**Running title:** Features of smaller ribosomes in CPR bacteria

**Keywords:** Candidate phyla radiation, ribosome, rRNA, ribosomal protein, bioinformatic

**Supplementary Table S1. Summary of the number of bacterial genome sequences used in this study**

**A. CPR bacteria**

| <b>Subgroup</b>                | <b>Phyla</b> | <b>Complete genomes</b> | <b>Draft genomes</b> |
|--------------------------------|--------------|-------------------------|----------------------|
| Microgenomates (MG)            | 14           | 9                       | 222                  |
| Parcubacteria 1 (PB1)          | 9            | 2                       | 117                  |
| Parcubacteria 2 (PB2)          | 5            | 0                       | 59                   |
| Parcubacteria 3 (PB3)          | 5            | 1                       | 44                   |
| Parcubacteria 4 (PB4)          | 9            | 6                       | 160                  |
| Other Parcubacteria (Other PB) | 9            | 5                       | 119                  |
| Katanobacteria (WWE3)          | 1            | 1                       | 25                   |
| Saccharibacteria (Sa)          | 1            | 32                      | 11                   |
| Peregrinibacteria (Pe)         | 1            | 7                       | 22                   |
| Others                         | 11           | 6                       | 49                   |
| <b>Total</b>                   | <b>65</b>    | <b>69</b>               | <b>828</b>           |

**B. non-CPR bacteria**

| <b>Lifestyle</b> | <b>Phyla</b> | <b>Complete genomes</b> | <b>Draft genomes</b> |
|------------------|--------------|-------------------------|----------------------|
| Symbiotic        | 10           | 167                     | 0                    |
| Free-living      | 31           | 1,494                   | 0                    |
| <b>Total</b>     | <b>32*</b>   | <b>1,661</b>            | <b>0</b>             |

\* Nine phyla were common between Symbiotic and Free-living.

**Supplementary Table S2. List of complete genomes of CPR bacteria used in this study**

| Accession #     | Subgroup | Phylum             | Organism name                                              | Genome size (base) |
|-----------------|----------|--------------------|------------------------------------------------------------|--------------------|
| GCA_001029675.1 | MG       | Beckwithbacteria   | Candidatus Beckwithbacteria bacterium<br>GW2011_GWC1_49_16 | 1,049,888          |
| GCA_016699265.1 | MG       | Roizmanbacteria    | Candidatus Roizmanbacteria bacterium                       | 928,688            |
| GCA_016700135.1 | MG       | Roizmanbacteria    | Candidatus Roizmanbacteria bacterium                       | 1,448,136          |
| GCA_013374835.1 | MG       | Woesebacteria      | Candidatus Woesebacteria bacterium                         | 901,682            |
| GCA_013374855.1 | MG       | Woesebacteria      | Candidatus Woesebacteria bacterium                         | 802,554            |
| GCA_013426185.1 | MG       | Woesebacteria      | Candidatus Woesebacteria bacterium                         | 818,817            |
| GCA_016700095.1 | MG       | Woesebacteria      | Candidatus Woesebacteria bacterium                         | 1,274,238          |
| GCA_001029755.1 | MG       | Woesebacteria      | Candidatus Woesebacteria bacterium<br>GW2011_GWF1_31_35    | 819,458            |
| GCA_009936135.1 | MG       | unclassified *     | Candidatus <i>Chazhembacterium aquaticus</i>               | 801,504            |
| GCA_016699775.1 | PB1      | Falkowbacteria     | Candidatus Falkowbacteria bacterium                        | 938,851            |
| GCA_016699205.1 | PB1      | Uhrbacteria        | Candidatus Uhrbacteria bacterium                           | 1,082,254          |
| GCA_001029635.1 | PB3      | Wolfbacteria       | Candidatus Wolfbacteria bacterium<br>GW2011_GWB1_47_1      | 984,447            |
| GCA_016699465.1 | PB4      | Campbellbacteria   | Candidatus Campbellbacteria bacterium                      | 811,376            |
| GCA_001029775.1 | PB4      | Campbellbacteria   | Candidatus Campbellbacteria bacterium<br>GW2011_OD1_34_28  | 752,630            |
| GCA_016699245.1 | PB4      | Kaiserbacteria     | Candidatus Kaiserbacteria bacterium                        | 1,054,716          |
| GCA_017134395.1 | PB4      | Kaiserbacteria     | Candidatus Kaiserbacteria bacterium                        | 687,746            |
| GCA_016699085.1 | PB4      | Nomurabacteria     | Candidatus Nomurabacteria bacterium                        | 808,221            |
| GCA_016699365.1 | PB4      | Nomurabacteria     | Candidatus Nomurabacteria bacterium                        | 705,143            |
| GCA_016699385.1 | Other PB | Moranbacteria      | Candidatus Moranbacteria bacterium                         | 1,111,322          |
| GCA_016699425.1 | Other PB | Moranbacteria      | Candidatus Moranbacteria bacterium                         | 1,217,328          |
| GCA_016699795.1 | Other PB | Moranbacteria      | Candidatus Moranbacteria bacterium                         | 1,186,598          |
| GCA_016699875.1 | Other PB | Moranbacteria      | Candidatus Moranbacteria bacterium                         | 1,088,644          |
| GCA_016699975.1 | Other PB | Moranbacteria      | Candidatus Moranbacteria bacterium                         | 1,048,819          |
| GCA_001007975.1 | Others   | Absconditabacteria | candidate division SR1 bacterium Aalborg_AAW-1             | 1,044,756          |
| GCA_000503875.1 | Others   | Absconditabacteria | candidate division SR1 bacterium RAAC1_SR1_1               | 1,177,760          |
| GCA_001029735.1 | Others   | Berkelbacteria     | Berkelbacteria bacterium GW2011_GWE1_39_12                 | 915,059            |
| GCA_004563595.2 | Others   | Gracilibacteria    | Candidatus Gracilibacteria bacterium 28_42_T64             | 1,343,103          |
| GCA_002761215.1 | Others   | Gracilibacteria    | Candidatus Gracilibacteria bacterium HOT-871               | 1,184,529          |
| GCA_001029795.1 | Others   | Kazan              | candidate division Kazan bacterium<br>GW2011_GWA1_50_15    | 602,646            |
| GCA_016699145.1 | Pe       | Peregrinibacteria  | Candidatus Peregrinibacteria bacterium                     | 1,338,973          |
| GCA_016699515.1 | Pe       | Peregrinibacteria  | Candidatus Peregrinibacteria bacterium                     | 1,338,661          |
| GCA_016699755.1 | Pe       | Peregrinibacteria  | Candidatus Peregrinibacteria bacterium                     | 1,560,578          |
| GCA_001430755.1 | Pe       | Peregrinibacteria  | Candidatus <i>Peribacter riflensis</i>                     | 1,248,026          |
| GCA_001430845.1 | Pe       | Peregrinibacteria  | Candidatus <i>Peribacter riflensis</i>                     | 1,248,112          |

|                 |      |                   |                                                            |           |
|-----------------|------|-------------------|------------------------------------------------------------|-----------|
| GCA_001430885.1 | Pe   | Peregrinibacteria | Candidatus <i>Peribacter riflensis</i>                     | 1,247,854 |
| GCA_001430905.1 | Pe   | Peregrinibacteria | Candidatus <i>Peribacter riflensis</i>                     | 1,248,180 |
| GCA_003516025.1 | Sa   | Saccharibacteria  | Candidatus Saccharibacteria bacterium                      | 1,005,782 |
| GCA_016699065.1 | Sa   | Saccharibacteria  | Candidatus Saccharibacteria bacterium                      | 979,137   |
| GCA_016699895.1 | Sa   | Saccharibacteria  | Candidatus Saccharibacteria bacterium                      | 749,073   |
| GCA_016699935.1 | Sa   | Saccharibacteria  | Candidatus Saccharibacteria bacterium                      | 1,226,308 |
| GCA_016699955.1 | Sa   | Saccharibacteria  | Candidatus Saccharibacteria bacterium                      | 1,211,496 |
| GCA_016700015.1 | Sa   | Saccharibacteria  | Candidatus Saccharibacteria bacterium                      | 1,011,181 |
| GCA_016700315.1 | Sa   | Saccharibacteria  | Candidatus Saccharibacteria bacterium                      | 988,272   |
| GCA_016700355.1 | Sa   | Saccharibacteria  | Candidatus Saccharibacteria bacterium                      | 1,006,672 |
| GCA_016700375.1 | Sa   | Saccharibacteria  | Candidatus Saccharibacteria bacterium                      | 1,256,494 |
| GCA_016700395.1 | Sa   | Saccharibacteria  | Candidatus Saccharibacteria bacterium                      | 936,132   |
| GCA_001029695.1 | Sa   | Saccharibacteria  | Candidatus Saccharibacteria bacterium<br>GW2011_GWC2_44_17 | 1,038,683 |
| GCA_005697215.1 | Sa   | Saccharibacteria  | Candidatus Saccharibacteria bacterium oral taxon 488       | 889,964   |
| GCA_010202115.1 | Sa   | Saccharibacteria  | Candidatus Saccharibacteria bacterium oral taxon 488       | 931,438   |
| GCA_010202465.1 | Sa   | Saccharibacteria  | Candidatus Saccharibacteria bacterium oral taxon 488       | 831,234   |
| GCA_010202645.1 | Sa   | Saccharibacteria  | Candidatus Saccharibacteria bacterium oral taxon 488       | 848,784   |
| GCA_010202845.1 | Sa   | Saccharibacteria  | Candidatus Saccharibacteria bacterium oral taxon 488       | 853,179   |
| GCA_013098515.1 | Sa   | Saccharibacteria  | Candidatus Saccharibacteria bacterium oral taxon 488       | 839,600   |
| GCA_013098855.1 | Sa   | Saccharibacteria  | Candidatus Saccharibacteria bacterium oral taxon 488       | 835,009   |
| GCA_013099015.1 | Sa   | Saccharibacteria  | Candidatus Saccharibacteria bacterium oral taxon 488       | 877,855   |
| GCA_013099195.1 | Sa   | Saccharibacteria  | Candidatus Saccharibacteria bacterium oral taxon 488       | 856,991   |
| GCA_013100805.1 | Sa   | Saccharibacteria  | Candidatus Saccharibacteria bacterium oral taxon 488       | 858,111   |
| GCA_013100825.1 | Sa   | Saccharibacteria  | Candidatus Saccharibacteria bacterium oral taxon 488       | 893,660   |
| GCA_013394755.1 | Sa   | Saccharibacteria  | Candidatus Saccharibacteria bacterium oral taxon 488       | 847,999   |
| GCA_005697055.1 | Sa   | Saccharibacteria  | Candidatus Saccharibacteria bacterium oral taxon 955       | 842,202   |
| GCA_010201925.1 | Sa   | Saccharibacteria  | Candidatus Saccharibacteria bacterium oral taxon 955       | 885,960   |
| GCA_010202265.1 | Sa   | Saccharibacteria  | Candidatus Saccharibacteria bacterium oral taxon 955       | 873,056   |
| GCA_013098655.1 | Sa   | Saccharibacteria  | Candidatus Saccharibacteria bacterium oral taxon 955       | 841,891   |
| GCA_005697565.1 | Sa   | Saccharibacteria  | Candidatus Saccharibacteria bacterium oral taxon 957       | 782,344   |
| GCA_000503915.1 | Sa   | Saccharibacteria  | Candidatus Saccharibacteria bacterium RAAC3_TM7_1          | 845,464   |
| GCA_002952755.1 | Sa   | Saccharibacteria  | Candidatus Saccharibacteria bacterium<br>YM_S32_TM7_50_20  | 1,450,269 |
| GCA_000392435.1 | Sa   | Saccharibacteria  | Candidatus <i>Saccharimonas aalborgensis</i>               | 1,013,781 |
| GCA_005697395.1 | Sa   | Saccharibacteria  | TM7 phylum sp. oral taxon 952                              | 705,178   |
| GCA_000503835.1 | WWE3 | WWE3              | candidate division WWE3 bacterium RAAC2_WWE3_1             | 878,109   |

\* Candidatus Chazhembacterium aquaticus is not a member of any candidate phyla described in NCBI taxonomy database.

Supplementary Table S2. Continued

**Supplementary Table S3. List of representative genomes of non-CPR free-living bacteria**

| Accession # | Phylum              | Organism name                                                         | Genome size (base) |
|-------------|---------------------|-----------------------------------------------------------------------|--------------------|
| NC_014318   | Actinobacteria      | <i>Amycolatopsis mediterranei</i> U32                                 | 10,236,715         |
| NC_004307   | Actinobacteria      | <i>Bifidobacterium longum</i> NCC2705                                 | 2,256,640          |
| NC_013172   | Actinobacteria      | <i>Brachybacterium faecium</i> DSM 4810                               | 3,614,992          |
| NC_003450   | Actinobacteria      | <i>Corynebacterium glutamicum</i> ATCC 13032                          | 3,309,401          |
| NC_008596   | Actinobacteria      | <i>Mycobacterium smegmatis</i> str. MC2 155                           | 6,988,209          |
| NC_010397   | Actinobacteria      | <i>Mycobacteroides abscessus</i>                                      | 5,067,172          |
| NC_003888   | Actinobacteria      | <i>Streptomyces coelicolor</i> A3(2)                                  | 8,667,507          |
| NC_000918   | Aquificae           | <i>Aquifex aeolicus</i> VF5                                           | 1,551,335          |
| NC_006347   | Bacteroidetes       | <i>Bacteroides fragilis</i> YCH46                                     | 5,277,274          |
| NC_009613   | Bacteroidetes       | <i>Flavobacterium psychrophilum</i> JIP02/86                          | 2,860,382          |
| NC_007677   | Bacteroidetes       | <i>Salinibacter ruber</i> DSM 13855                                   | 3,551,823          |
| NC_002932   | Chlorobi            | <i>Chlorobium tepidum</i> TLS                                         | 2,154,946          |
| NC_010175   | Chloroflexi         | <i>Chloroflexus aurantiacus</i> J-10-fl                               | 5,258,541          |
| NC_005125   | Cyanobacteria       | <i>Gloeobacter violaceus</i> PCC 7421                                 | 4,659,019          |
| NC_005042   | Cyanobacteria       | <i>Prochlorococcus marinus</i> subsp. <i>marinus</i> str. CCMP1375    | 1,751,080          |
| NC_004113   | Cyanobacteria       | <i>Thermosynechococcus elongatus</i> BP-1                             | 2,593,857          |
| NC_001263   | Deinococcus-Thermus | <i>Deinococcus radiodurans</i> R1                                     | 3,060,986          |
| NC_006461   | Deinococcus-Thermus | <i>Thermus thermophilus</i> HB8                                       | 1,849,742          |
| NC_011661   | Dictyoglomi         | <i>Dictyoglomus turgidum</i> DSM 6724                                 | 1,855,560          |
| NC_000964   | Firmicutes          | <i>Bacillus subtilis</i> subsp. <i>subtilis</i> str. 168              | 4,215,606          |
| NC_004722   | Firmicutes          | <i>Bacillus cereus</i> ATCC 14579                                     | 5,411,809          |
| NC_003030   | Firmicutes          | <i>Clostridium acetobutylicum</i> ATCC 824                            | 3,940,880          |
| NC_009495   | Firmicutes          | <i>Clostridium botulinum</i> A str. ATCC 3502                         | 3,886,916          |
| NC_004668   | Firmicutes          | <i>Enterococcus faecalis</i> V583                                     | 3,218,031          |
| NC_017960   | Firmicutes          | <i>Enterococcus faecium</i> DO                                        | 2,698,137          |
| NC_004567   | Firmicutes          | <i>Lactobacillus plantarum</i> WCFS1                                  | 3,308,273          |
| NC_008526   | Firmicutes          | <i>Lactobacillus paracasei</i> ATCC 334                               | 2,895,264          |
| NC_002662   | Firmicutes          | <i>Lactococcus lactis</i> subsp. <i>lactis</i> II1403                 | 2,365,589          |
| NC_003210   | Firmicutes          | <i>Listeria monocytogenes</i> EGD-e                                   | 2,944,528          |
| NC_004461   | Firmicutes          | <i>Staphylococcus epidermidis</i> ATCC 12228                          | 2,499,279          |
| NC_007795   | Firmicutes          | <i>Staphylococcus aureus</i> subsp. <i>aureus</i> NCTC 8325           | 2,821,361          |
| NC_003098   | Firmicutes          | <i>Streptococcus pneumoniae</i> R6                                    | 2,038,615          |
| NC_004350   | Firmicutes          | <i>Streptococcus mutans</i> UA159                                     | 2,032,925          |
| NC_012926   | Firmicutes          | <i>Streptococcus suis</i> BM407                                       | 2,146,229          |
| NC_013853   | Firmicutes          | <i>Streptococcus mitis</i> B6                                         | 2,146,611          |
| NC_005957   | Firmicutes          | [ <i>Bacillus thuringiensis</i> ] serovar <i>konkukian</i> str. 97-27 | 5,237,682          |
| NC_003454   | Fusobacteria        | <i>Fusobacterium nucleatum</i> subsp. <i>nucleatum</i> ATCC 25586     | 2,174,500          |
| NC_011296   | Nitrospirae         | <i>Thermodesulfovibrio yellowstonii</i> DSM 11347                     | 2,003,803          |
| NC_005027   | Planctomycetes      | <i>Rhodopirellula baltica</i> SH 1                                    | 7,145,576          |

|           |                |                                                                                       |           |
|-----------|----------------|---------------------------------------------------------------------------------------|-----------|
| NC_016603 | Proteobacteria | <i>Acinetobacter pittii</i> PHEA-2                                                    | 3,862,530 |
| NC_003062 | Proteobacteria | <i>Agrobacterium fabrum</i> str. C58                                                  | 4,917,157 |
| NC_002929 | Proteobacteria | <i>Bordetella pertussis</i> Tohama I                                                  | 4,086,189 |
| NC_019382 | Proteobacteria | <i>Bordetella bronchiseptica</i> 253                                                  | 5,264,383 |
| NC_006348 | Proteobacteria | <i>Burkholderia mallei</i> ATCC 23344                                                 | 5,835,527 |
| NC_006350 | Proteobacteria | <i>Burkholderia pseudomallei</i> K96243                                               | 7,247,547 |
| NC_002696 | Proteobacteria | <i>Caulobacter crescentus</i> CB15                                                    | 4,016,947 |
| NC_002937 | Proteobacteria | <i>Desulfovibrio vulgaris</i> str. Hildenborough                                      | 3,570,858 |
| NC_014121 | Proteobacteria | <i>Enterobacter cloacae</i> subsp. <i>cloacae</i> ATCC 13047                          | 5,314,581 |
| NC_000913 | Proteobacteria | <i>Escherichia coli</i> str. K-12 substr. MG1655                                      | 4,641,652 |
| NC_006570 | Proteobacteria | <i>Francisella tularensis</i> subsp. <i>tularensis</i> SCHU S4                        | 1,892,775 |
| NC_002939 | Proteobacteria | <i>Geobacter sulfurreducens</i> PCA                                                   | 3,814,128 |
| NC_000915 | Proteobacteria | <i>Helicobacter pylori</i> 26695                                                      | 1,667,867 |
| NC_017384 | Proteobacteria | <i>Ketogulonicigenium vulgare</i> WSH-001                                             | 2,766,400 |
| NC_016845 | Proteobacteria | <i>Klebsiella pneumoniae</i> subsp. <i>pneumoniae</i> HS11286                         | 5,333,942 |
| NC_002942 | Proteobacteria | <i>Legionella pneumophila</i> subsp. <i>pneumophila</i> str. Philadelphia 1           | 3,397,754 |
| NC_002946 | Proteobacteria | <i>Neisseria gonorrhoeae</i> FA 1090                                                  | 2,153,922 |
| NC_002516 | Proteobacteria | <i>Pseudomonas aeruginosa</i> PAO1                                                    | 6,264,404 |
| NC_002947 | Proteobacteria | <i>Pseudomonas putida</i> KT2440                                                      | 6,181,873 |
| NC_004578 | Proteobacteria | <i>Pseudomonas syringae</i> pv. <i>tomato</i> str. DC3000                             | 6,397,126 |
| NC_007643 | Proteobacteria | <i>Rhodospirillum rubrum</i> ATCC 11170                                               | 4,352,825 |
| NC_003197 | Proteobacteria | <i>Salmonella enterica</i> subsp. <i>enterica</i> serovar <i>Typhimurium</i> str. LT2 | 4,857,450 |
| NC_004347 | Proteobacteria | <i>Shewanella oneidensis</i> MR-1                                                     | 4,969,811 |
| NC_004337 | Proteobacteria | <i>Shigella flexneri</i> 2a str. 301                                                  | 4,607,202 |
| NC_003047 | Proteobacteria | <i>Sinorhizobium meliloti</i> 1021                                                    | 3,654,135 |
| NC_012587 | Proteobacteria | <i>Sinorhizobium fredii</i> NGR234                                                    | 3,925,702 |
| NC_003902 | Proteobacteria | <i>Xanthomonas campestris</i> pv. <i>campestris</i> str. ATCC 33913                   | 5,076,188 |
| NC_003143 | Proteobacteria | <i>Yersinia pestis</i> CO92                                                           | 4,653,728 |
| NC_004342 | Spirochaetes   | <i>Leptospira interrogans</i> serovar <i>Lai</i> str. 56601                           | 4,698,134 |
| NC_002967 | Spirochaetes   | <i>Treponema denticola</i> ATCC 35405                                                 | 2,843,201 |
| NC_000853 | Thermotogae    | <i>Thermotoga maritima</i> MSB8                                                       | 1,860,725 |

Supplementary Table S3. Continued

**Supplementary Table S4. List of representative genomes of non-CPR symbiotic bacteria**

| Accession # | Phylum         | Organism name                                                                           | Genome size (base) |
|-------------|----------------|-----------------------------------------------------------------------------------------|--------------------|
| NC_004572   | Actinobacteria | <i>Tropheryma whipplei</i> str. Twist                                                   | 927,303            |
| NC_016621   | Bacteroidetes  | <i>Blattabacterium</i> sp. ( <i>Cryptocercus punctulatus</i> ) str. Cpu                 | 605,745            |
| NC_020510   | Bacteroidetes  | <i>Blattabacterium cuenoti</i> BPAA                                                     | 632,490            |
| NC_018605   | Bacteroidetes  | <i>Cardinium</i> endosymbiont cEper1 of <i>Encarsia pergandiella</i>                    | 887,130            |
| NC_000117   | Chlamydiae     | <i>Chlamydia trachomatis</i> D/UW-3/CX                                                  | 1,042,519          |
| NC_002620   | Chlamydiae     | <i>Chlamydia muridarum</i> str. Nigg                                                    | 1,072,950          |
| NC_007899   | Chlamydiae     | <i>Chlamydia felis</i> Fe/C-56                                                          | 1,166,239          |
| NC_010287   | Chlamydiae     | <i>Chlamydia trachomatis</i> 434/Bu                                                     | 1,038,842          |
| NC_017287   | Chlamydiae     | <i>Chlamydia psittaci</i> 6BC                                                           | 1,171,667          |
| NZ_CP006571 | Chlamydiae     | <i>Chlamydia avium</i> 10DC88                                                           | 1,041,170          |
| NZ_CP015840 | Chlamydiae     | <i>Chlamydia gallinacea</i> 08-1274/3                                                   | 1,059,583          |
| NZ_LT821323 | Chlamydiae     | <i>Chlamydia suis</i>                                                                   | 1,075,789          |
| NC_000922   | Chlamydiae     | <i>Chlamydophila pneumoniae</i> CWL029                                                  | 1,230,230          |
| NC_003361   | Chlamydiae     | <i>Chlamydophila caviae</i> GPIC                                                        | 1,173,390          |
| NC_015408   | Chlamydiae     | <i>Chlamydophila pecorum</i> E58                                                        | 1,106,197          |
| NC_020419   | Elusimicrobia  | uncultured Termite group 1 bacterium phylotype Rs-D17                                   | 1,125,857          |
| NZ_CP017037 | Firmicutes     | <i>Dialister pneumosintes</i>                                                           | 1,274,073          |
| NZ_CP009224 | Firmicutes     | <i>Weissella ceti</i>                                                                   | 1,390,397          |
| NZ_CP014606 | Firmicutes     | endosymbiont 'TC1' of <i>Trimyema compressum</i>                                        | 1,586,453          |
| NZ_CP011280 | Fusobacteria   | <i>Sneathia amnii</i>                                                                   | 1,330,224          |
| NC_007797   | Proteobacteria | <i>Anaplasma phagocytophilum</i> str. HZ                                                | 1,471,282          |
| NC_012026   | Proteobacteria | <i>Anaplasma marginale</i> str. Florida                                                 | 1,202,435          |
| NC_013532   | Proteobacteria | <i>Anaplasma centrale</i> str. Israel                                                   | 1,206,806          |
| NZ_CP013920 | Proteobacteria | <i>Arsenophonus</i> symbiont of <i>Lipoptena fortisetosa</i>                            | 836,724            |
| NC_008783   | Proteobacteria | <i>Bartonella bacilliformis</i> KC583                                                   | 1,445,021          |
| NZ_CP010401 | Proteobacteria | <i>Bartonella ancashensis</i>                                                           | 1,467,695          |
| NZ_CP010048 | Proteobacteria | <i>Blochmannia</i> endosymbiont of <i>Polyrhachis (Hedomyrma) turneri</i>               | 749,321            |
| NZ_CP010049 | Proteobacteria | <i>Blochmannia</i> endosymbiont of <i>Camponotus (Colobopsis) obliquus</i>              | 773,940            |
| NC_002528   | Proteobacteria | <i>Buchnera aphidicola</i> str. APS ( <i>Acyrtosiphon pisum</i> )                       | 640,681            |
| NC_008513   | Proteobacteria | <i>Buchnera aphidicola</i> BCc                                                          | 416,380            |
| NC_017256   | Proteobacteria | <i>Buchnera aphidicola</i> str. Ak ( <i>Acyrtosiphon kondoi</i> )                       | 641,794            |
| NZ_CP011299 | Proteobacteria | <i>Buchnera aphidicola</i> ( <i>Schlechtendalia chinensis</i> )                         | 607,835            |
| NZ_LT635893 | Proteobacteria | <i>Buchnera aphidicola</i> ( <i>Cinara pseudotaxifoliae</i> )                           | 446,627            |
| NZ_CP007770 | Proteobacteria | <i>Campylobacter insulaenigrae</i> NCTC 12927                                           | 1,465,081          |
| NC_009465   | Proteobacteria | Candidatus <i>Vesicomysocius okutanii</i> HA                                            | 1,022,154          |
| NC_019814   | Proteobacteria | Candidatus <i>Kinetoplastibacterium blastocritidii</i> (ex <i>Strigomonas culicis</i> ) | 820,037            |
| NC_002971   | Proteobacteria | <i>Coxiella burnetii</i> RSA 493                                                        | 1,995,488          |
| NZ_CP007541 | Proteobacteria | <i>Coxiella</i> endosymbiont of <i>Amblyomma americanum</i>                             | 656,901            |
| NC_009446   | Proteobacteria | <i>Dichelobacter nodosus</i> VCS1703A                                                   | 1,389,350          |

|             |                |                                                                               |           |
|-------------|----------------|-------------------------------------------------------------------------------|-----------|
| NC_007354   | Proteobacteria | <i>Ehrlichia canis</i> str. Jake                                              | 1,315,030 |
| NC_007799   | Proteobacteria | <i>Ehrlichia chaffeensis</i> str. Arkansas                                    | 1,176,248 |
| NC_023063   | Proteobacteria | <i>Ehrlichia muris</i> AS145                                                  | 1,196,717 |
| NC_008011   | Proteobacteria | <i>Lawsonia intracellularis</i> PHE/MN1-00                                    | 1,457,619 |
| NC_007798   | Proteobacteria | <i>Neorickettsia sennetsu</i> str. Miyayama                                   | 859,006   |
| NC_013009   | Proteobacteria | <i>Neorickettsia risticii</i> str. Illinois                                   | 879,977   |
| NZ_CP007481 | Proteobacteria | <i>Neorickettsia helminthoeca</i> str. Oregon                                 | 884,232   |
| NC_000963   | Proteobacteria | <i>Rickettsia prowazekii</i> str. Madrid E                                    | 1,111,523 |
| NC_003103   | Proteobacteria | <i>Rickettsia conorii</i> str. Malish 7                                       | 1,268,755 |
| NC_007109   | Proteobacteria | <i>Rickettsia felis</i> URRWXCal2                                             | 1,485,148 |
| NC_016050   | Proteobacteria | <i>Rickettsia japonica</i> YH                                                 | 1,283,087 |
| NC_004344   | Proteobacteria | <i>Wigglesworthia glossinidia</i> endosymbiont of <i>Glossina brevipalpis</i> | 697,724   |
| NC_002978   | Proteobacteria | <i>Wolbachia endosymbiont</i> of <i>Drosophila melanogaster</i>               | 1,267,782 |
| NC_021084   | Proteobacteria | <i>Wolbachia endosymbiont</i> of <i>Drosophila simulans</i> wNo               | 1,301,823 |
| NC_001318   | Spirochaetes   | <i>Borrelia burgdorferi</i> B31                                               | 910,724   |
| NC_018887   | Spirochaetes   | <i>Borrelia afzelii</i> HLJ01                                                 | 905,471   |
| NZ_CP015780 | Spirochaetes   | <i>Borrelia mayonii</i>                                                       | 904,387   |
| NZ_CP009117 | Spirochaetes   | <i>Borrelia valaisiana</i> Tom4006                                            | 912,160   |
| NZ_CP018744 | Spirochaetes   | <i>Borrelia garinii</i>                                                       | 905,638   |
| NC_006055   | Tenericutes    | <i>Mesoplasma florum</i> L1                                                   | 793,224   |
| NC_000908   | Tenericutes    | <i>Mycoplasma genitalium</i> G37                                              | 580,076   |
| NC_000912   | Tenericutes    | <i>Mycoplasma pneumoniae</i> M129                                             | 816,394   |
| NC_005364   | Tenericutes    | <i>Mycoplasma mycoides</i> subsp. <i>mycoides</i> SC str. PG1                 | 1,211,703 |
| NC_014760   | Tenericutes    | <i>Mycoplasma bovis</i> PG45                                                  | 1,003,404 |
| NC_022575   | Tenericutes    | <i>Mycoplasma parvum</i> str. Indiana                                         | 564,395   |
| NC_005303   | Tenericutes    | Onion yellows phytoplasma OY-M                                                | 853,092   |
| NC_021284   | Tenericutes    | <i>Spiroplasma syrphidicola</i> EA-1                                          | 1,107,344 |
| NC_021846   | Tenericutes    | <i>Spiroplasma taiwanense</i> CT-1                                            | 1,075,140 |
| NZ_CP006720 | Tenericutes    | <i>Spiroplasma mirum</i> ATCC 29335                                           | 1,132,608 |
| NZ_CP012328 | Tenericutes    | <i>Spiroplasma turonicum</i>                                                  | 1,261,374 |
| NC_010503   | Tenericutes    | <i>Ureaplasma parvum</i> serovar 3 str. ATCC 27815                            | 751,679   |

Supplementary Table S4. Continued



**Supplementary Table S5. List of query sequences (COG sequences) for ribosomal proteins**

| <b>Protein name</b> | <b>COG ID</b> | <b>Number of sequences</b> | <b>Protein name</b> | <b>GOG ID</b> | <b>Number of sequences</b> |
|---------------------|---------------|----------------------------|---------------------|---------------|----------------------------|
| bS1                 | COG0539       | 729                        | uL1                 | COG0539       | 709                        |
| uS2                 | COG0052       | 709                        | uL2                 | COG0052       | 707                        |
| uS3                 | COG0092       | 707                        | uL3                 | COG0092       | 710                        |
| uS4                 | COG0522       | 744                        | uL4                 | COG0522       | 709                        |
| uS5                 | COG0098       | 709                        | uL5                 | COG0098       | 710                        |
| bS6                 | COG0360       | 628                        | uL6                 | COG0360       | 707                        |
| uS7                 | COG0049       | 712                        | bL9                 | COG0049       | 640                        |
| uS8                 | COG0096       | 709                        | uL10                | COG0096       | 623                        |
| uS9                 | COG0103       | 712                        | uL11                | COG0103       | 707                        |
| uS10                | COG0051       | 723                        | bL12                | COG0051       | 716                        |
| uS11                | COG0100       | 704                        | uL13                | COG0100       | 707                        |
| uS12                | COG0048       | 711                        | uL14                | COG0048       | 709                        |
| uS13                | COG0099       | 717                        | uL15                | COG0099       | 709                        |
| uS14                | COG0199       | 663                        | uL16                | COG0199       | 710                        |
| uS15                | COG0184       | 710                        | bL17                | COG0184       | 628                        |
| bS16                | COG0228       | 624                        | uL18                | COG0228       | 703                        |
| uS17                | COG0186       | 706                        | bL19                | COG0186       | 625                        |
| bS18                | COG0238       | 631                        | bL20                | COG0238       | 627                        |
| uS19                | COG0185       | 704                        | bL21                | COG0185       | 624                        |
| bS20                | COG0268       | 611                        | uL22                | COG0268       | 709                        |
| bS21                | COG0828       | 505                        | uL23                | COG0828       | 706                        |
|                     |               |                            | uL24                | COG0539       | 703                        |
|                     |               |                            | bL25                | COG0052       | 563                        |
|                     |               |                            | bL27                | COG0092       | 635                        |
|                     |               |                            | bL28                | COG0522       | 634                        |
|                     |               |                            | uL29                | COG0098       | 659                        |
|                     |               |                            | uL30                | COG0360       | 594                        |
|                     |               |                            | bL31                | COG0049       | 688                        |
|                     |               |                            | bL32                | COG0096       | 579                        |
|                     |               |                            | bL33                | COG0103       | 673                        |
|                     |               |                            | bL34                | COG0051       | 468                        |
|                     |               |                            | bL35                | COG0100       | 598                        |
|                     |               |                            | bL36                | COG0048       | 559                        |

See the following URL for each COG ID:  
<https://www.ncbi.nlm.nih.gov/research/cog-project/>

**Supplementary Table S6. List of queries (Pfam domain data) for ribosomal proteins**

| <b>Protein name</b> | <b>Pfam ID</b> | <b>Domain name</b> | <b>Protein name</b> | <b>Pfam ID</b> | <b>Domain name</b> |
|---------------------|----------------|--------------------|---------------------|----------------|--------------------|
| bS1                 | PF00575        | S1                 | uL1                 | PF00687        | Ribosomal_L1       |
| uS2                 | PF00318        | Ribosomal_S2       | uL2                 | PF00181        | Ribosomal_L2       |
| uS3                 | PF00189        | Ribosomal_S3_C     | uL2                 | PF03947        | Ribosomal_L2_C     |
| uS4                 | PF00163        | Ribosomal_S4       | uL3                 | PF00297        | Ribosomal_L3       |
| uS5                 | PF00333        | Ribosomal_S5       | uL4                 | PF00573        | Ribosomal_L4       |
| bS5                 | PF03719        | Ribosomal_S5_C     | uL5                 | PF00281        | Ribosomal_L5       |
| bS6                 | PF01250        | Ribosomal_S6       | uL5                 | PF00673        | Ribosomal_L5_C     |
| uS7                 | PF00177        | Ribosomal_S7       | uL6                 | PF00347        | Ribosomal_L6       |
| uS8                 | PF00410        | Ribosomal_S8       | bL9                 | PF03948        | Ribosomal_L9_C     |
| uS9                 | PF00380        | Ribosomal_S9       | bL9                 | PF01281        | Ribosomal_L9_N     |
| uS10                | PF00338        | Ribosomal_S10      | uL10                | PF00466        | Ribosomal_L10      |
| uS11                | PF00411        | Ribosomal_S11      | uL11                | PF00298        | Ribosomal_L11      |
| uS12                | PF00164        | Ribosom_S12_S23    | uL11                | PF03946        | Ribosomal_L11_N    |
| uS13                | PF00416        | Ribosomal_S13      | bL12                | PF00542        | Ribosomal_L12      |
| uS14                | PF00253        | Ribosomal_S14      | bL12                | PF16320        | Ribosomal_L12_N    |
| uS15                | PF00312        | Ribosomal_S15      | uL13                | PF00572        | Ribosomal_L13      |
| bS16                | PF00886        | Ribosomal_S16      | uL14                | PF00238        | Ribosomal_L14      |
| uS17                | PF00366        | Ribosomal_S17      | uL15                | PF00828        | Ribosomal_L27A     |
| bS18                | PF01084        | Ribosomal_S18      | uL16                | PF00252        | Ribosomal_L16      |
| uS19                | PF00203        | Ribosomal_S19      | bL17                | PF01196        | Ribosomal_L17      |
| bS20                | PF01649        | Ribosomal_S20p     | uL18                | PF00861        | Ribosomal_L18p     |
| bS21                | PF01165        | Ribosomal_S21      | bL19                | PF01245        | Ribosomal_L19      |
|                     |                |                    | bL20                | PF00453        | Ribosomal_L20      |
|                     |                |                    | bL21                | PF00829        | Ribosomal_L21p     |
|                     |                |                    | uL22                | PF00237        | Ribosomal_L22      |
|                     |                |                    | uL23                | PF00276        | Ribosomal_L23      |
|                     |                |                    | uL24                | PF17136        | ribosomal_L24      |
|                     |                |                    | bL25                | PF01386        | Ribosomal_L25p     |
|                     |                |                    | bL25                | PF14693        | Ribosomal_TL5_C    |
|                     |                |                    | bL27                | PF01016        | Ribosomal_L27      |
|                     |                |                    | bL28                | PF00830        | Ribosomal_L28      |
|                     |                |                    | uL29                | PF00831        | Ribosomal_L29      |
|                     |                |                    | uL30                | PF00327        | Ribosomal_L30      |
|                     |                |                    | bL31                | PF01197        | Ribosomal_L31      |
|                     |                |                    | bL32                | PF01783        | Ribosomal_L32p     |
|                     |                |                    | bL33                | PF00471        | Ribosomal_L33      |
|                     |                |                    | bL34                | PF00468        | Ribosomal_L34      |
|                     |                |                    | bL35                | PF01632        | Ribosomal_L35p     |
|                     |                |                    | bL36                | PF00444        | Ribosomal_L36      |

See the following URL for each COG ID:  
<http://pfam.xfam.org/>

**Supplementary Table S7. Statistical comparison of ribosomal protein length in CPR and non-CPR bacteria.**

| <b>Protein name</b> | <b>Length in CPR<br/>(aa)</b> | <b>Length in non-CPR<br/>(aa)</b> | <b><i>p</i>-value<br/>(Mann–Whitney U test)</b> |
|---------------------|-------------------------------|-----------------------------------|-------------------------------------------------|
| bS1                 | 389.7 ± 46.5                  | 519.9 ± 90.0                      | < 0.001                                         |
| uS2                 | 260.1 ± 33.0                  | 266.9 ± 27.7                      | < 0.001                                         |
| uS3                 | 226.3 ± 19.6                  | 239.7 ± 22.6                      | < 0.001                                         |
| uS4                 | 210.4 ± 20.4                  | 204.4 ± 6.8                       | < 0.001                                         |
| uS5                 | 185.9 ± 28.9                  | 181.4 ± 23.9                      | < 0.001                                         |
| bS6                 | 153.5 ± 43.0                  | 119.5 ± 28.5                      | < 0.001                                         |
| uS7                 | 162.4 ± 27.5                  | 156.4 ± 2.7                       | < 0.001                                         |
| uS8                 | 137.8 ± 19.1                  | 130.9 ± 7.7                       | < 0.001                                         |
| uS9                 | 153.5 ± 22.1                  | 140.4 ± 19.3                      | < 0.001                                         |
| uS10                | 120.1 ± 24.2                  | 103.3 ± 8.5                       | < 0.001                                         |
| uS11                | 144.9 ± 19.9                  | 130.7 ± 5.4                       | < 0.001                                         |
| uS12                | 149.0 ± 15.5                  | 127.5 ± 6.2                       | < 0.001                                         |
| uS13                | 134.2 ± 10.4                  | 121.7 ± 4.2                       | < 0.001                                         |
| uS14                | 69.0 ± 13.4                   | 83.1 ± 18.7                       | < 0.001                                         |
| uS15                | 102.4 ± 21.4                  | 89.1 ± 2.3                        | < 0.001                                         |
| bS16                | 126.1 ± 35.7                  | 109.3 ± 34.9                      | < 0.001                                         |
| uS17                | 91.8 ± 17.0                   | 88.6 ± 8.7                        | 0.9958                                          |
| bS18                | 77.8 ± 13.1                   | 83.0 ± 11.5                       | < 0.001                                         |
| uS19                | 110.2 ± 19.5                  | 92.2 ± 3.9                        | < 0.001                                         |
| bS20                | 99.9 ± 19.3                   | 88.5 ± 7.4                        | < 0.001                                         |
| bS21                | 81.1 ± 20.2                   | 67.1 ± 8.7                        | < 0.001                                         |
| uL1                 | 265.9 ± 47.9                  | 232.2 ± 4.6                       | < 0.001                                         |
| uL2                 | 274.9 ± 18.8                  | 276.5 ± 5.6                       | < 0.001                                         |
| uL3                 | 219.3 ± 38.4                  | 217.9 ± 16.5                      | 0.0108                                          |
| uL4                 | 229.3 ± 25.9                  | 210.2 ± 16.5                      | < 0.001                                         |
| uL5                 | 187.7 ± 17.3                  | 183.3 ± 7.2                       | < 0.001                                         |
| uL6                 | 187.9 ± 15.4                  | 178.9 ± 3.0                       | < 0.001                                         |
| bL9                 | 153.0 ± 17.2                  | 159.6 ± 44.0                      | 0.0561                                          |
| uL10                | 183.6 ± 19.3                  | 173.1 ± 21.2                      | < 0.001                                         |
| uL11                | 146.1 ± 13.1                  | 143.7 ± 7.8                       | 0.3477                                          |
| bL12                | 141.0 ± 21.7                  | 125.5 ± 23.6                      | < 0.001                                         |
| uL13                | 136.0 ± 18.2                  | 146.5 ± 6.7                       | < 0.001                                         |
| uL14                | 126.4 ± 10.8                  | 122.1 ± 1.6                       | < 0.001                                         |
| uL15                | 150.5 ± 24.1                  | 150.4 ± 12.4                      | < 0.001                                         |
| uL16                | 140.7 ± 13.6                  | 139.7 ± 3.6                       | 0.0671                                          |
| bL17                | 132.9 ± 21.0                  | 141.5 ± 27.3                      | < 0.001                                         |
| uL18                | 121.4 ± 13.9                  | 120.1 ± 4.9                       | 0.0076                                          |

|      |              |              |         |
|------|--------------|--------------|---------|
| bL19 | 145.5 ± 32.5 | 121.8 ± 12.4 | < 0.001 |
| bL20 | 116.7 ± 9.3  | 120.9 ± 10.3 | < 0.001 |
| bL21 | 115.5 ± 17.1 | 112.0 ± 26.5 | < 0.001 |
| uL22 | 149.9 ± 28.9 | 120.6 ± 16.6 | < 0.001 |
| uL23 | 121.5 ± 26.8 | 100.2 ± 10.3 | < 0.001 |
| uL24 | 110.2 ± 21.4 | 105.6 ± 11.7 | 0.0013  |
| bL25 | 238.7 ± 27.5 | 194.4 ± 37.7 | < 0.001 |
| bL27 | 93.7 ± 15.1  | 89.0 ± 6.9   | < 0.001 |
| bL28 | 83.4 ± 24.1  | 74.8 ± 11.9  | < 0.001 |
| uL29 | 73.4 ± 11.7  | 71.7 ± 28.0  | < 0.001 |
| bL31 | 103.7 ± 24.5 | 78.6 ± 15.9  | < 0.001 |
| bL32 | 78.5 ± 23.3  | 60.0 ± 5.9   | < 0.001 |
| bL33 | 60.8 ± 11.1  | 53.2 ± 5.1   | < 0.001 |
| bL34 | 54.6 ± 14.6  | 45.7 ± 4.4   | < 0.001 |
| bL35 | 70.2 ± 11.3  | 65.6 ± 11.3  | < 0.001 |
| bL36 | 44.0 ± 12.9  | 38.6 ± 2.6   | < 0.001 |

---

Supplementary Table S7. Continued

**Supplementary Table S8. Ribosomal protein sequence alignments (FASTA format) used to generate Supplementary Figure S4.**

**Supplementary Table S9. rRNA gene sequence alignments (FASTA format) used to generate Supplementary Figure S5.**

**These datasets are supplied as the separate files.**

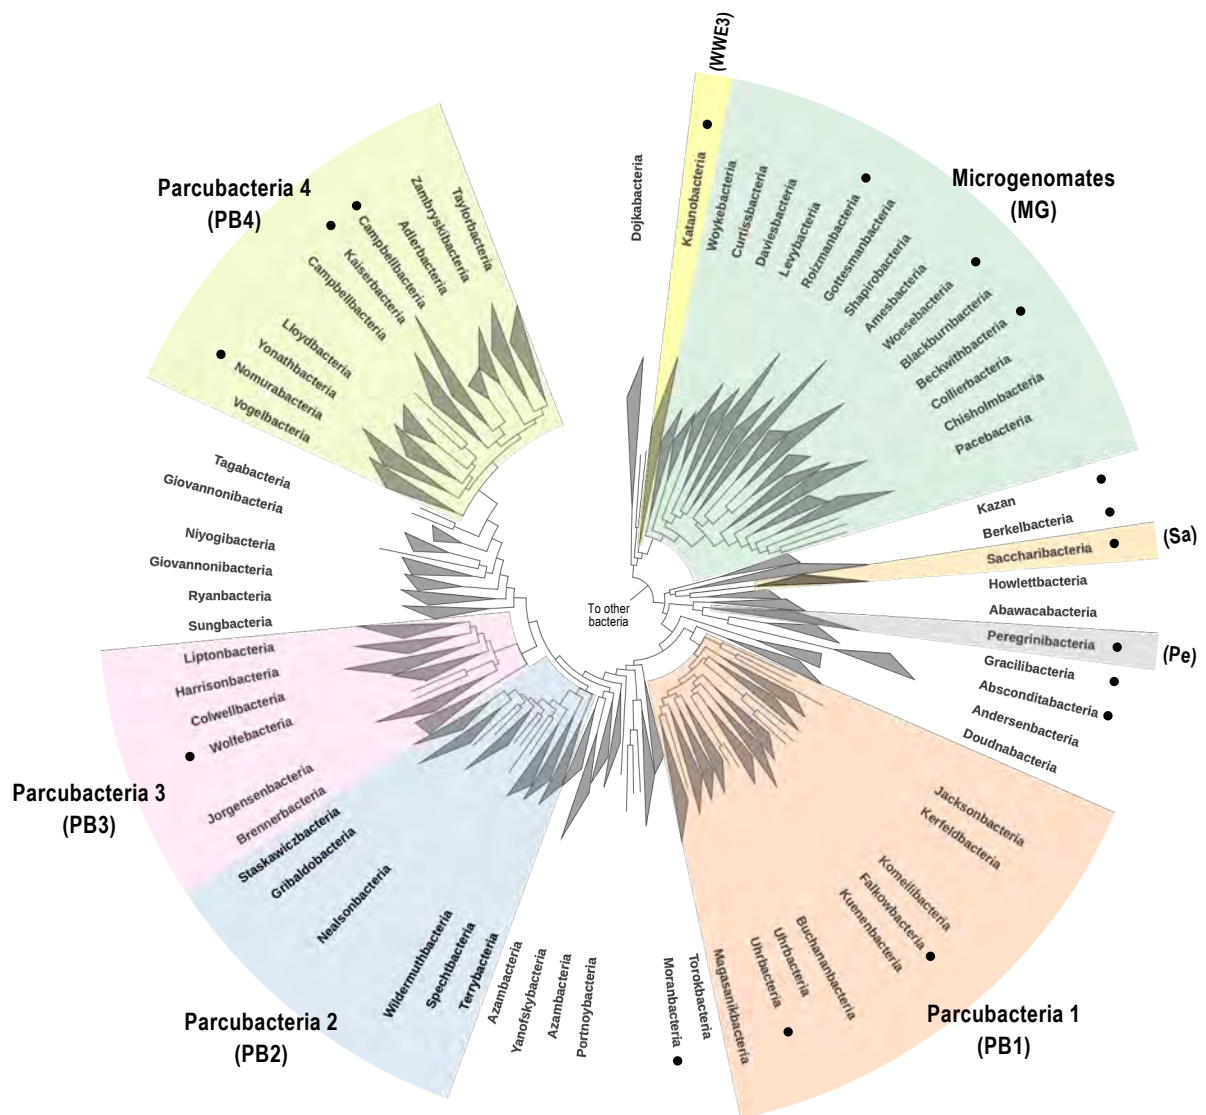

**Supplementary Figure S1. Phylogenetic relationships of CPR bacteria.** The phylogenetic tree data were acquired from a previous report (Jaffe *et al.* 2020). Parcubacteria 1-4 (PB1-4), which are monophyletic subgroups within the Parcubacteria superphylum, are highlighted in different colors, as is the Microgenomates superphylum (MG). Three representative phyla outside Parcubacteria and Microgenomates are also highlighted: Katanobacteria (formerly known as WWE3); Saccharibacteria (Sa); and Peregrinibacteria (Pe). Phyla with complete genomes included in our study are marked with black dots.

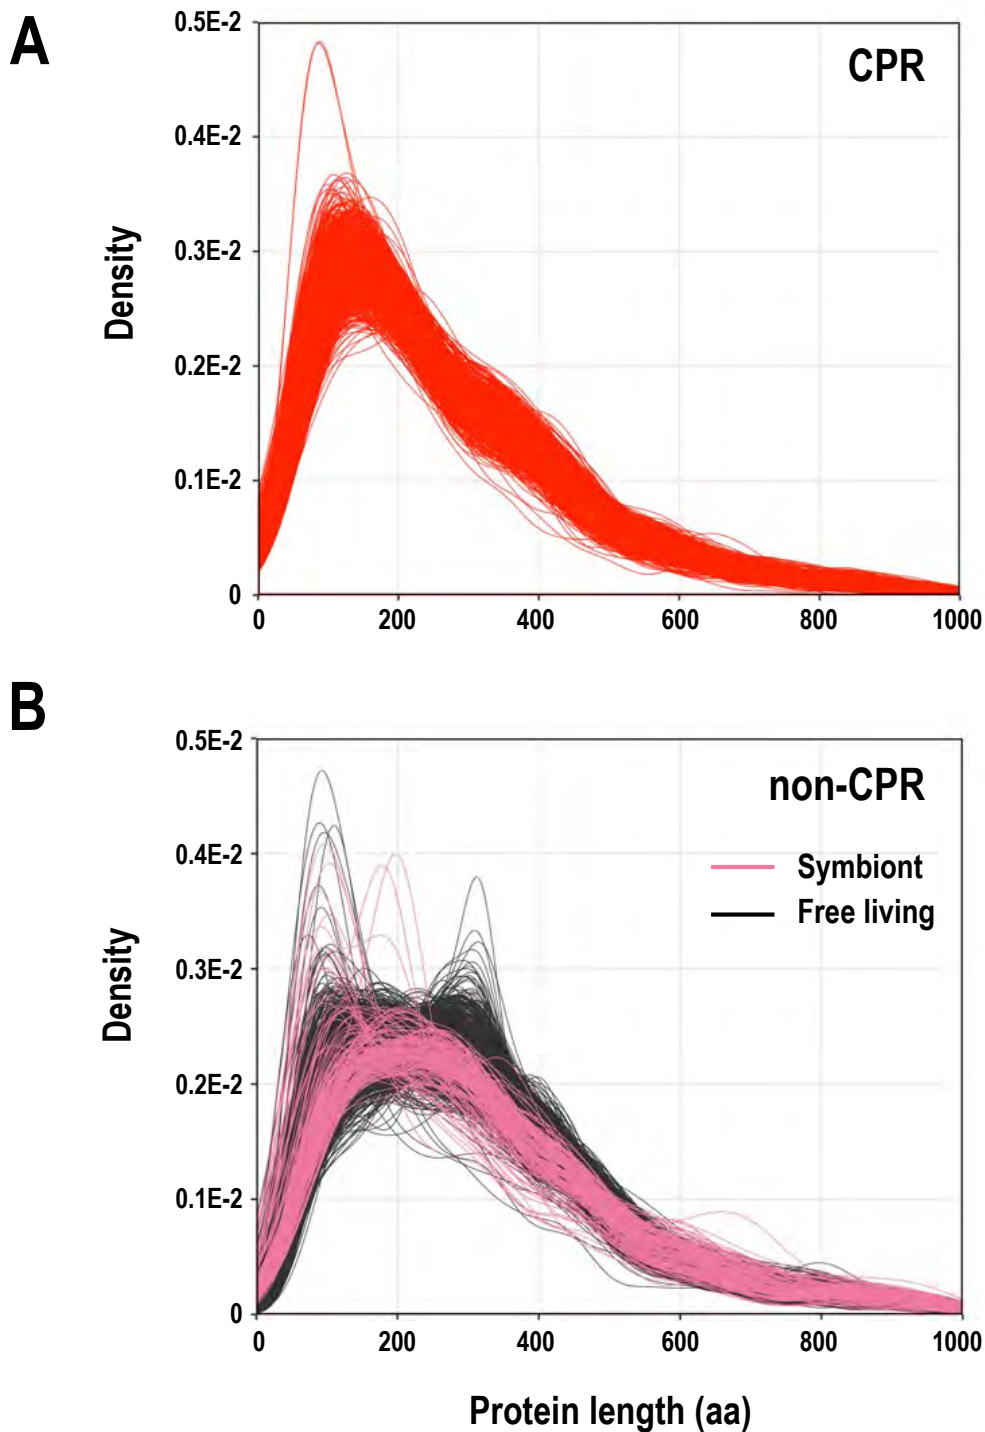

**Supplementary Figure S2. Distribution of lengths of proteins encoded in 897 CPR and 1,661 non-CPR bacterial genomes.** (A) Distribution of the lengths of proteins encoded in 897 CPR genomes (69 complete and 828 draft genomes). (B) Distribution of the lengths of proteins encoded in 1,661 non-CPR genomes (167 symbiotic [pink lines] and 1,494 free-living [black lines] species). Distributions of the lengths of proteins are shown as density curves based on the deduced amino acid sequences of the protein genes in each genome.

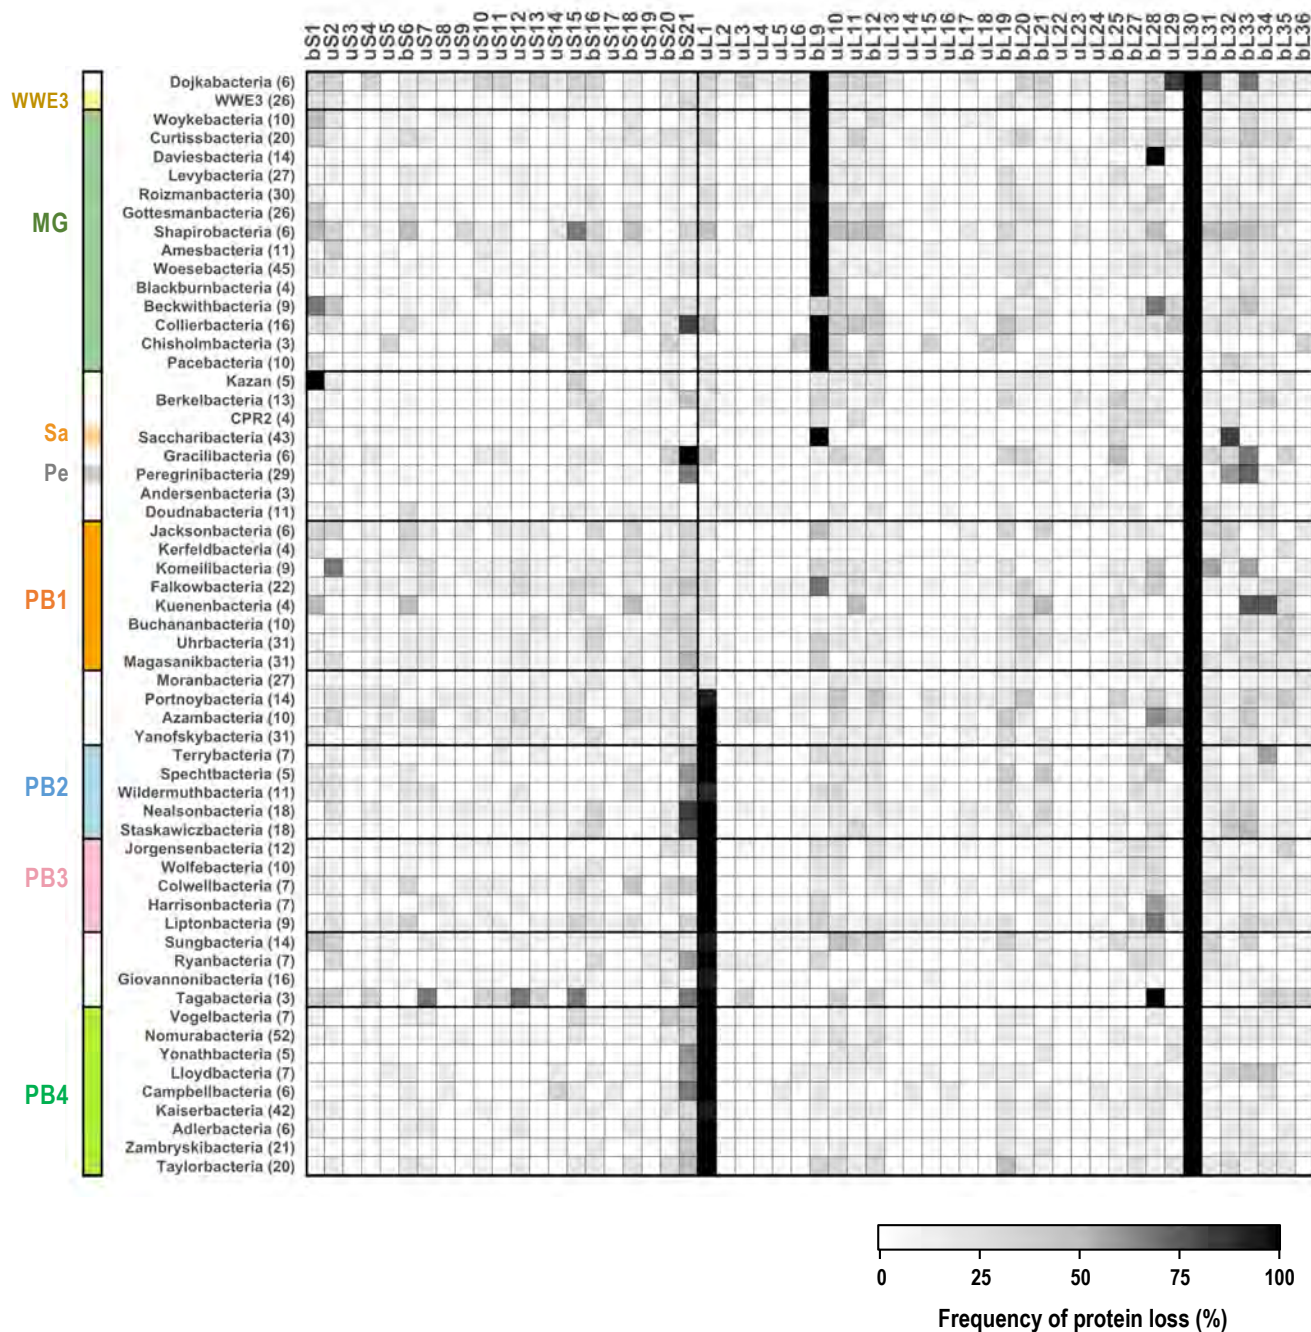

**Supplementary Figure S3. Phylum-level distribution of each ribosomal protein in CPR bacteria.**

The distributions of 21 SSU and 33 LSU ribosomal proteins (columns) across 59 CPR phyla (rows) for which at least three genomes were available. The white-to-black gradient indicates the frequency of the lack of a ribosomal protein in each phylum. The rows were sorted based on a phylogenetic tree (Jaffe *et al.* 2020), and the number given to the right of each phylum name is the number of genomes belonging to that phylum. Left panel indicates CPR subgroups, with the colors corresponding to those in Supplementary Figure S1. MG: Microgenomates; Sa: Saccharibacteria; Pe: Peregrinibacteria; PB: Parcubacteria.



# bS1

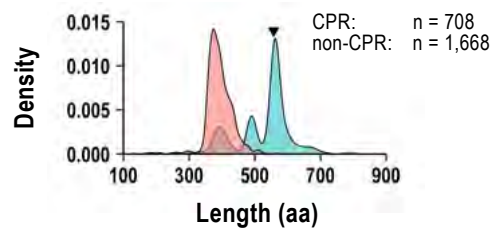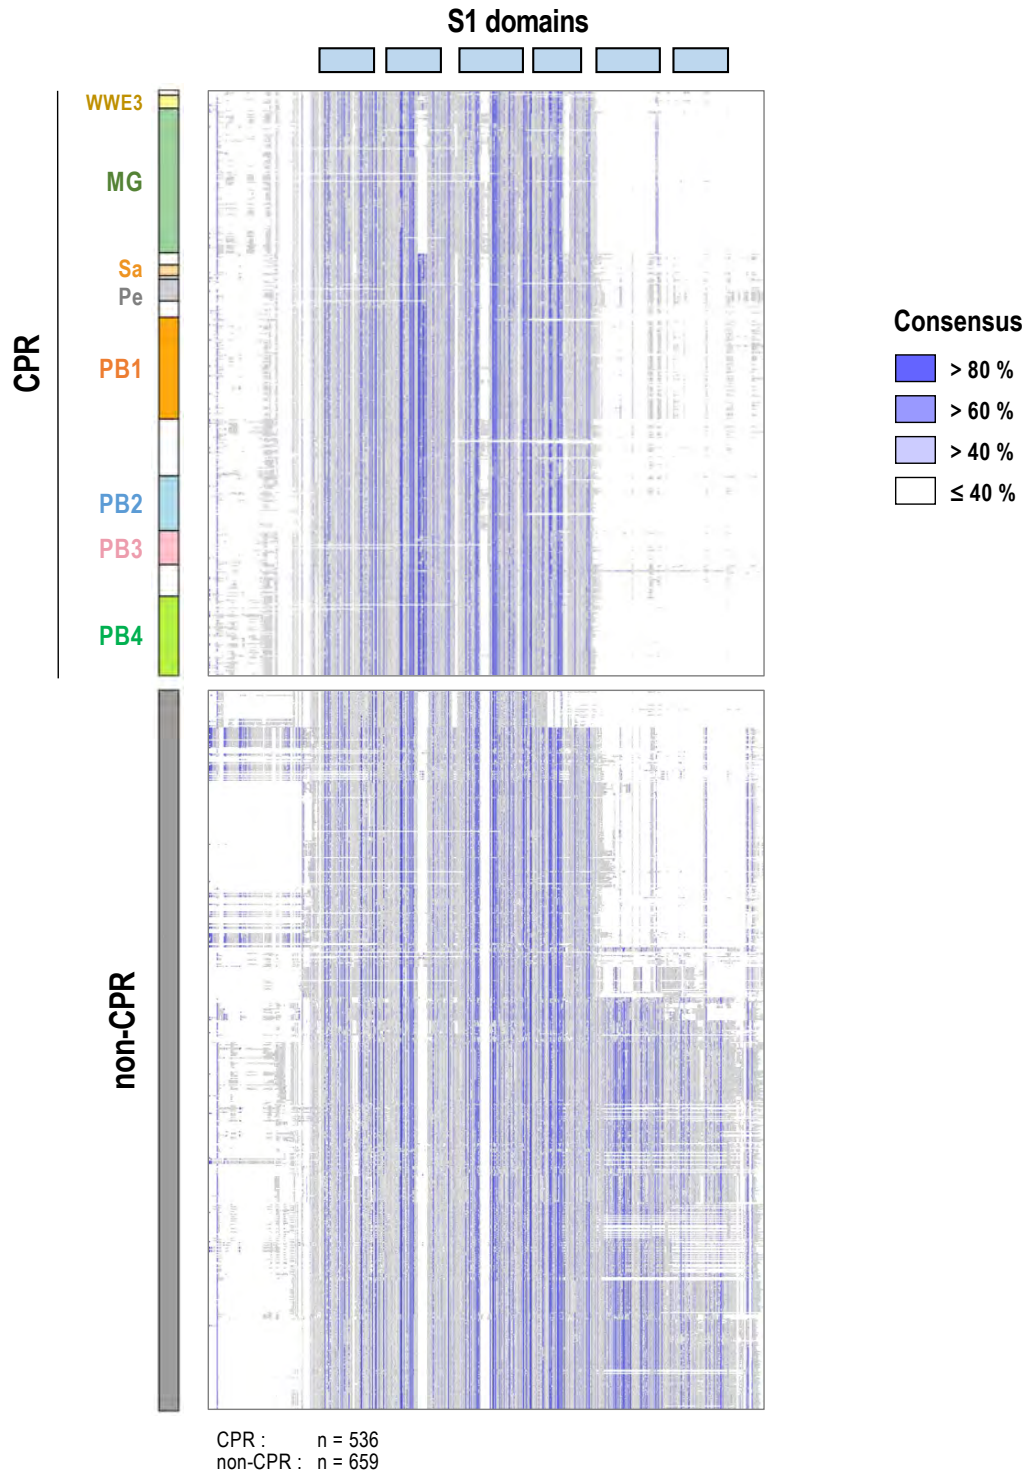

Supplementary Figure S4

### uS2

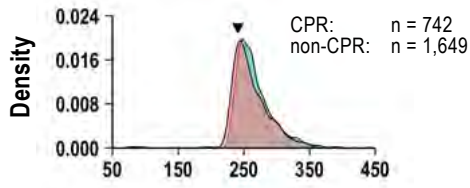

### uS3

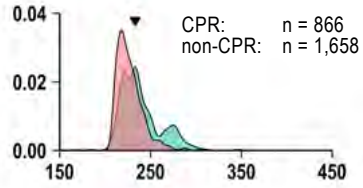

### uS4

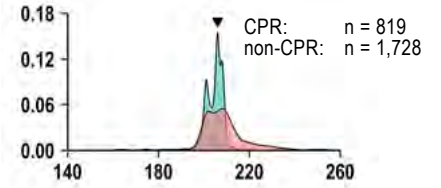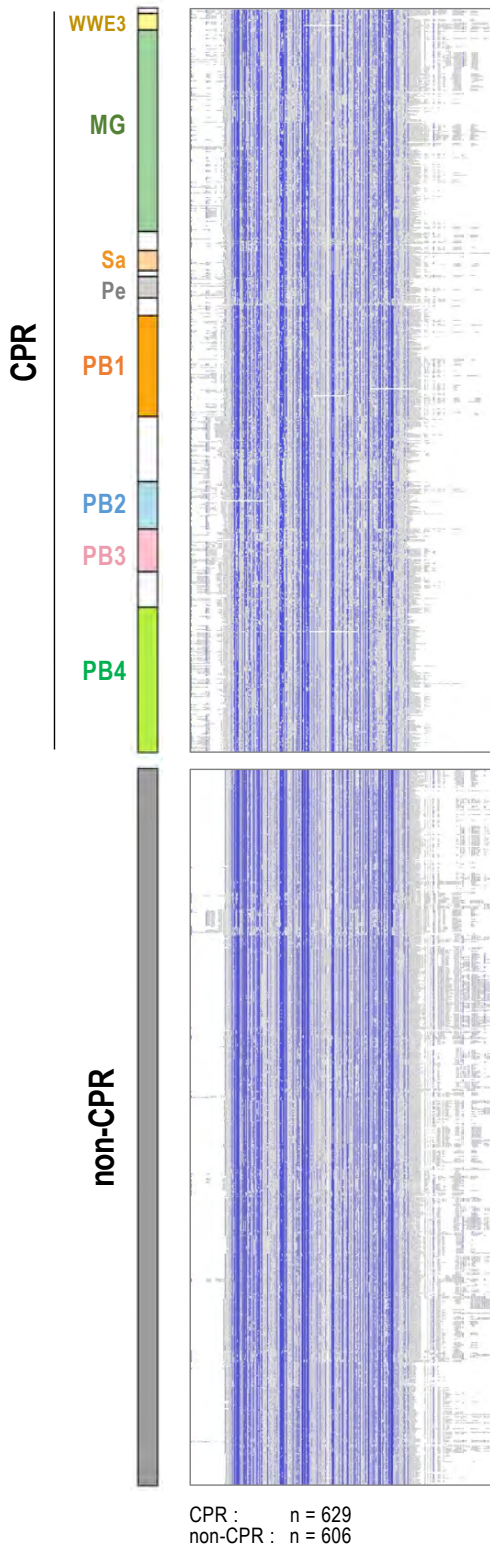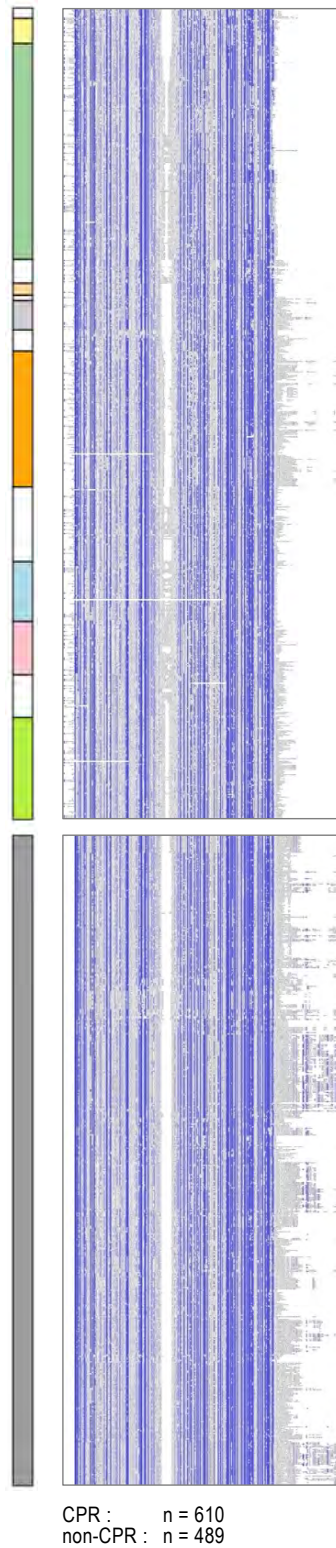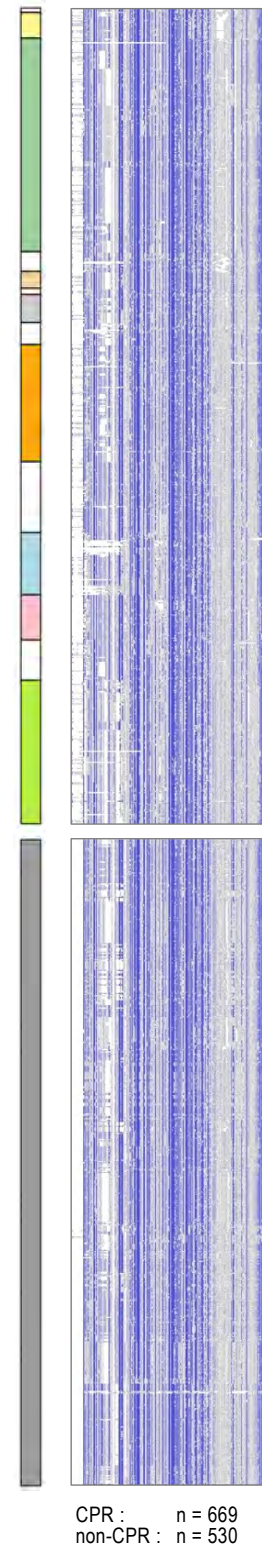

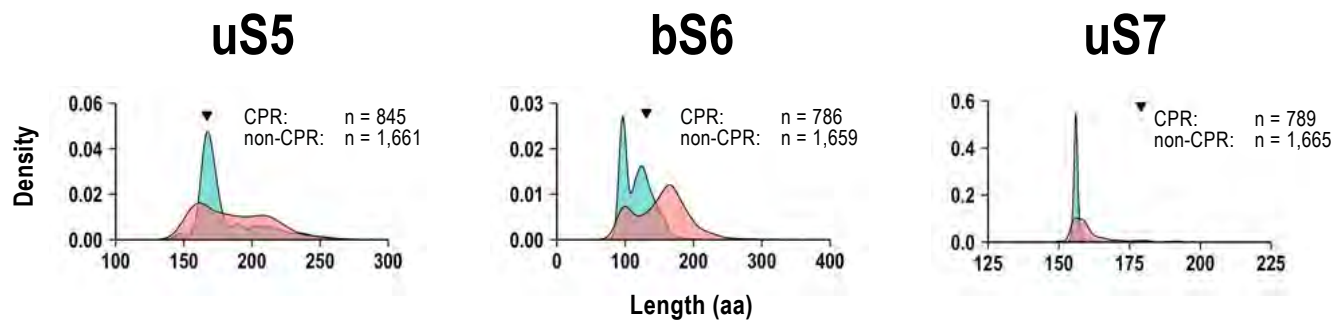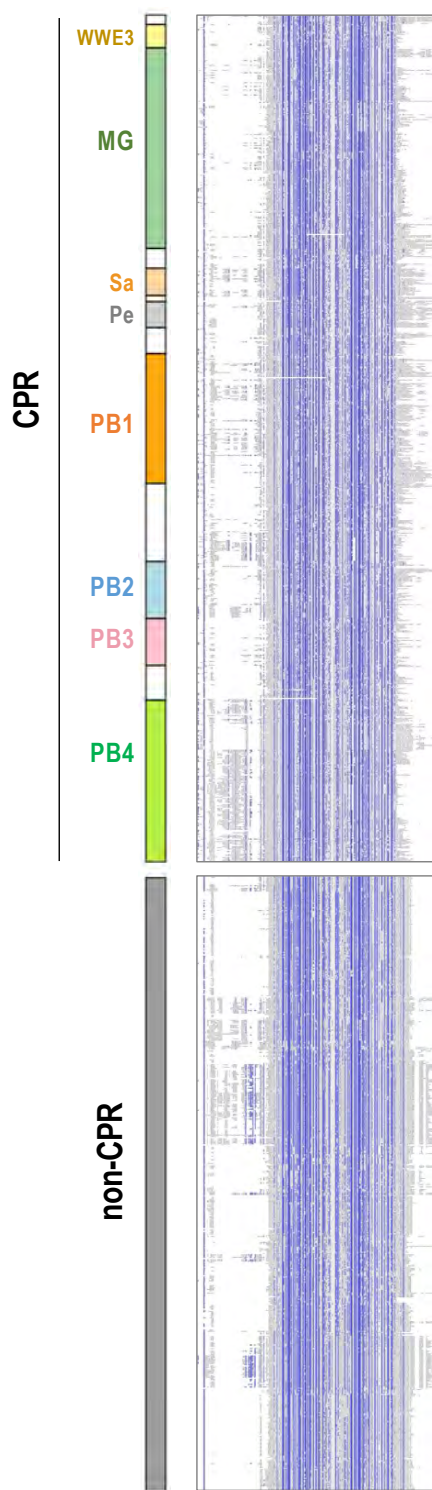

CPR : n = 685  
 non-CPR : n = 497

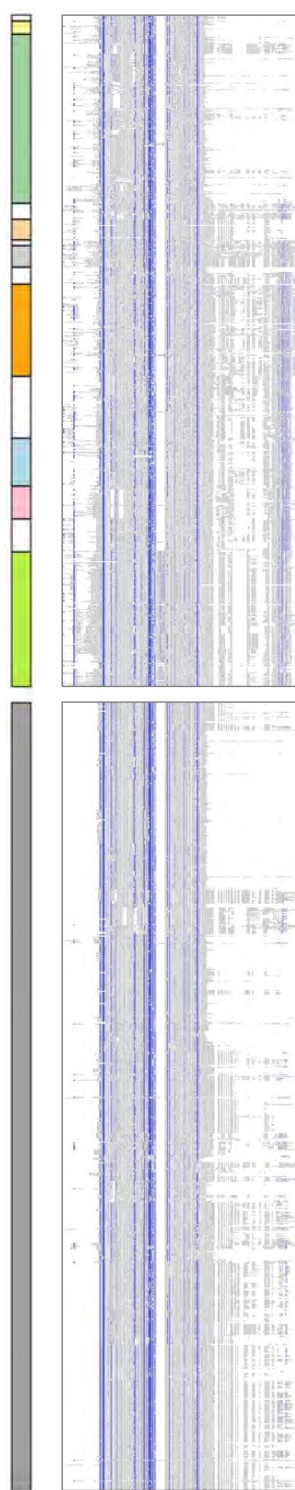

CPR : n = 716  
 non-CPR : n = 841

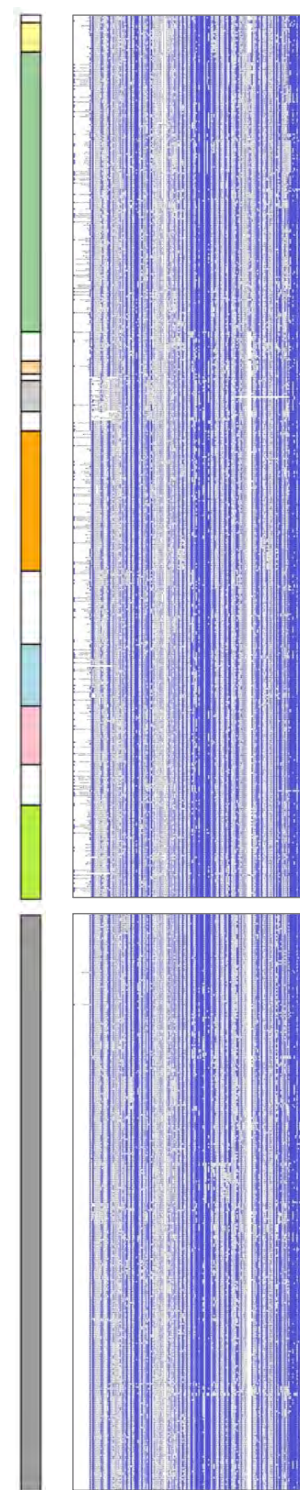

CPR : n = 544  
 non-CPR : n = 355

### uS8

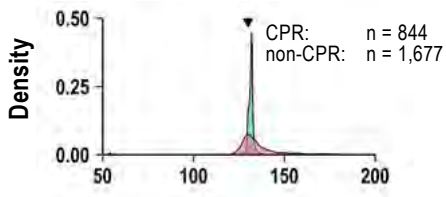

### uS9

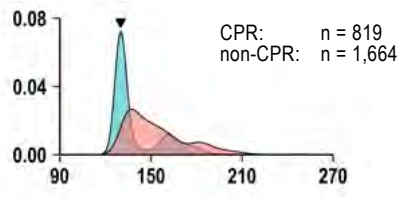

### uS10

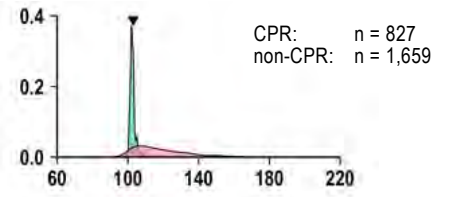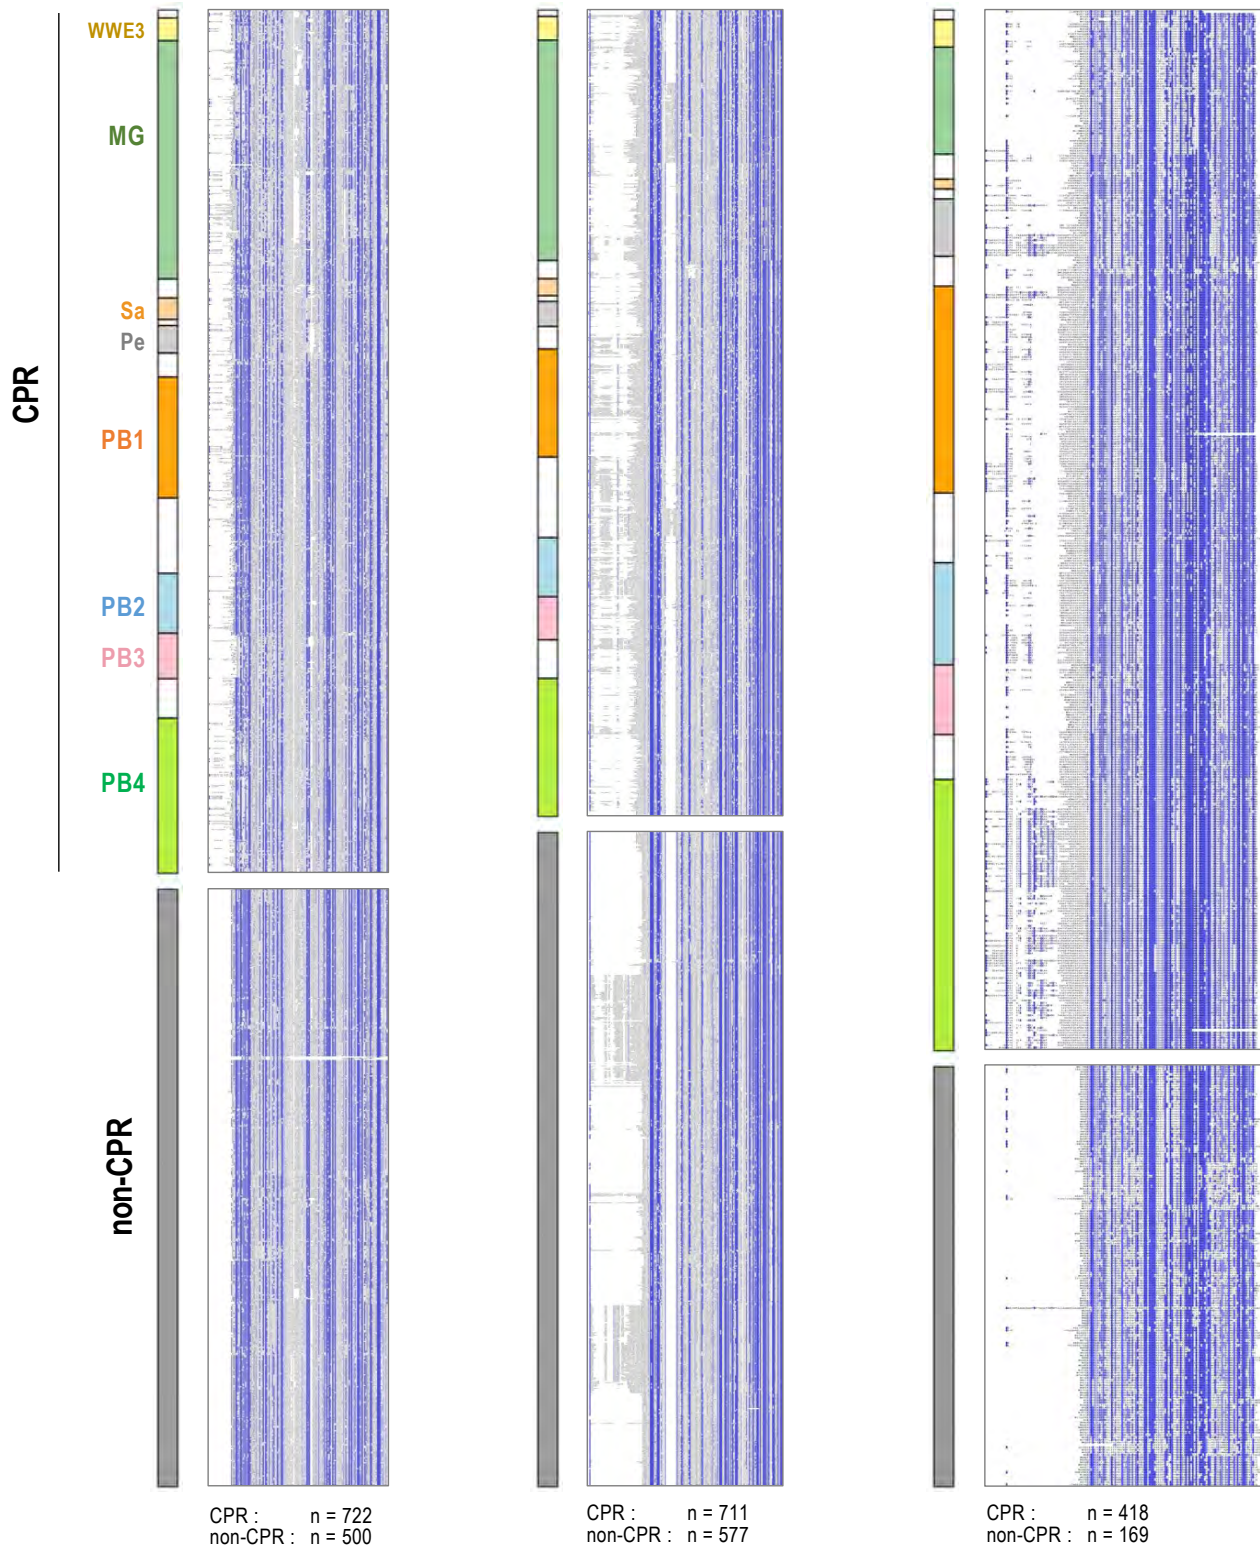

# uS11

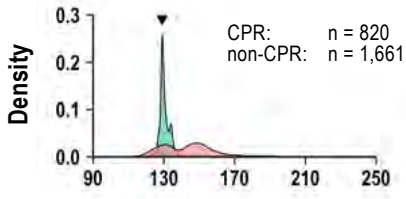

# uS12

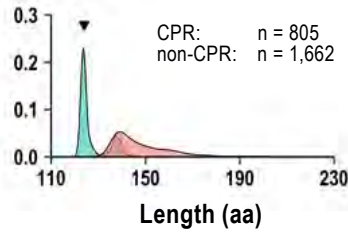

# uS13

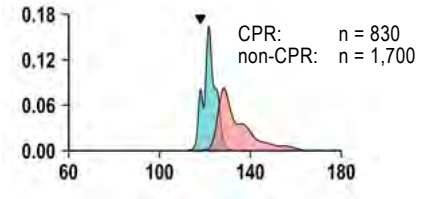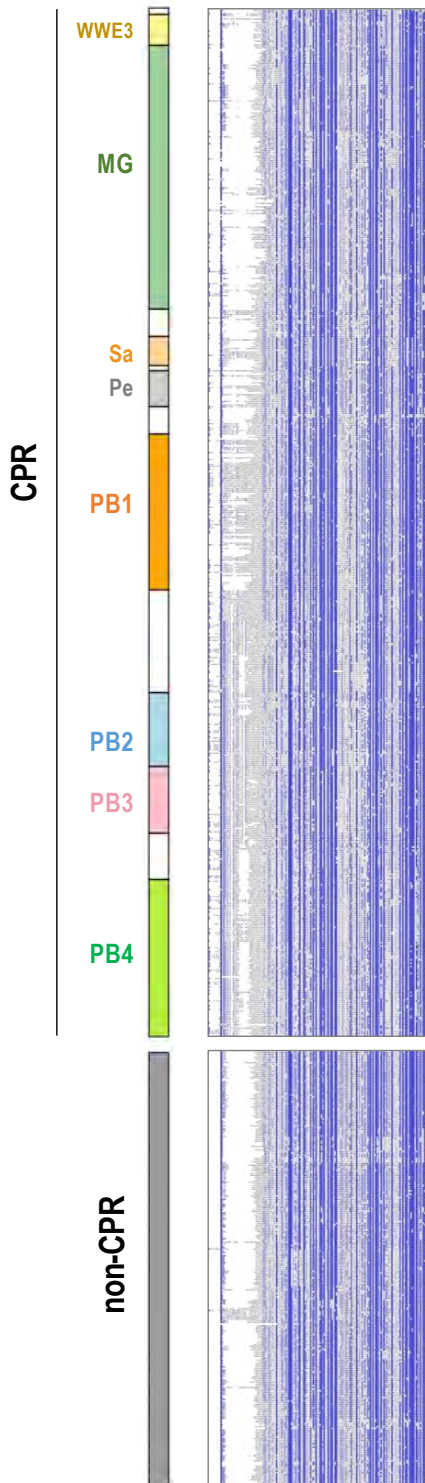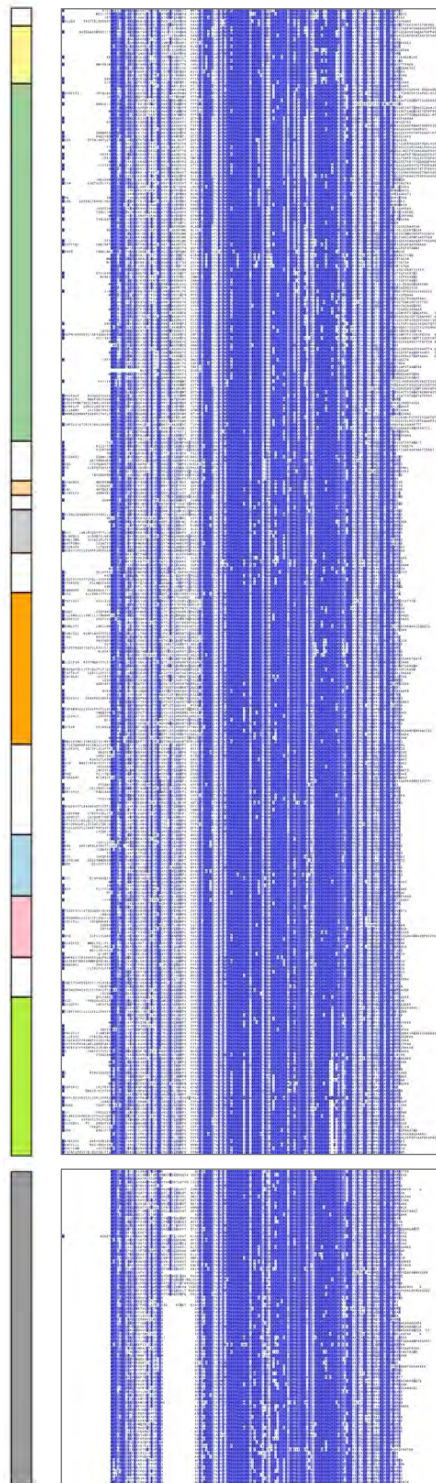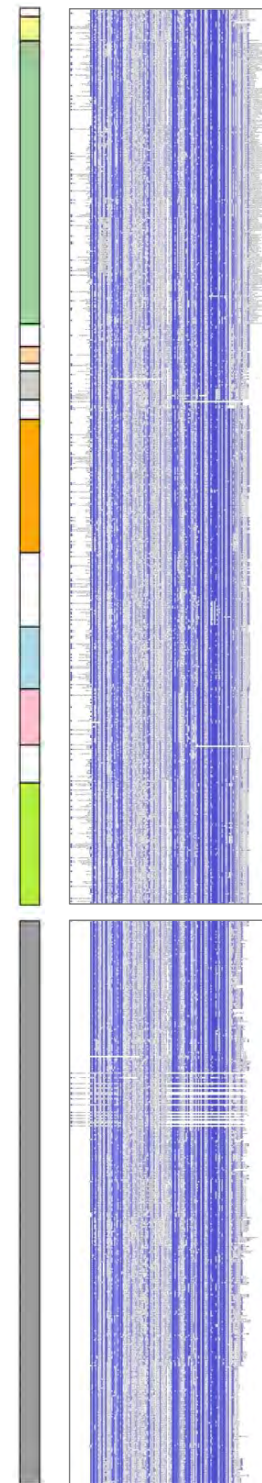

# uS14

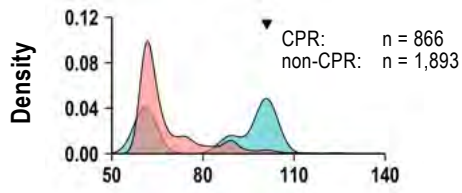

# uS15

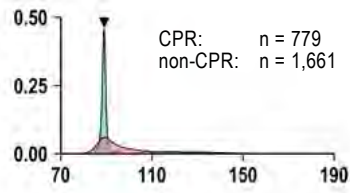

# bS16

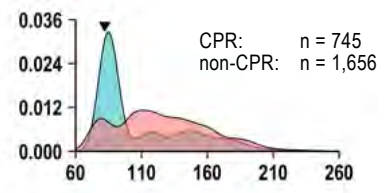

Length (aa)

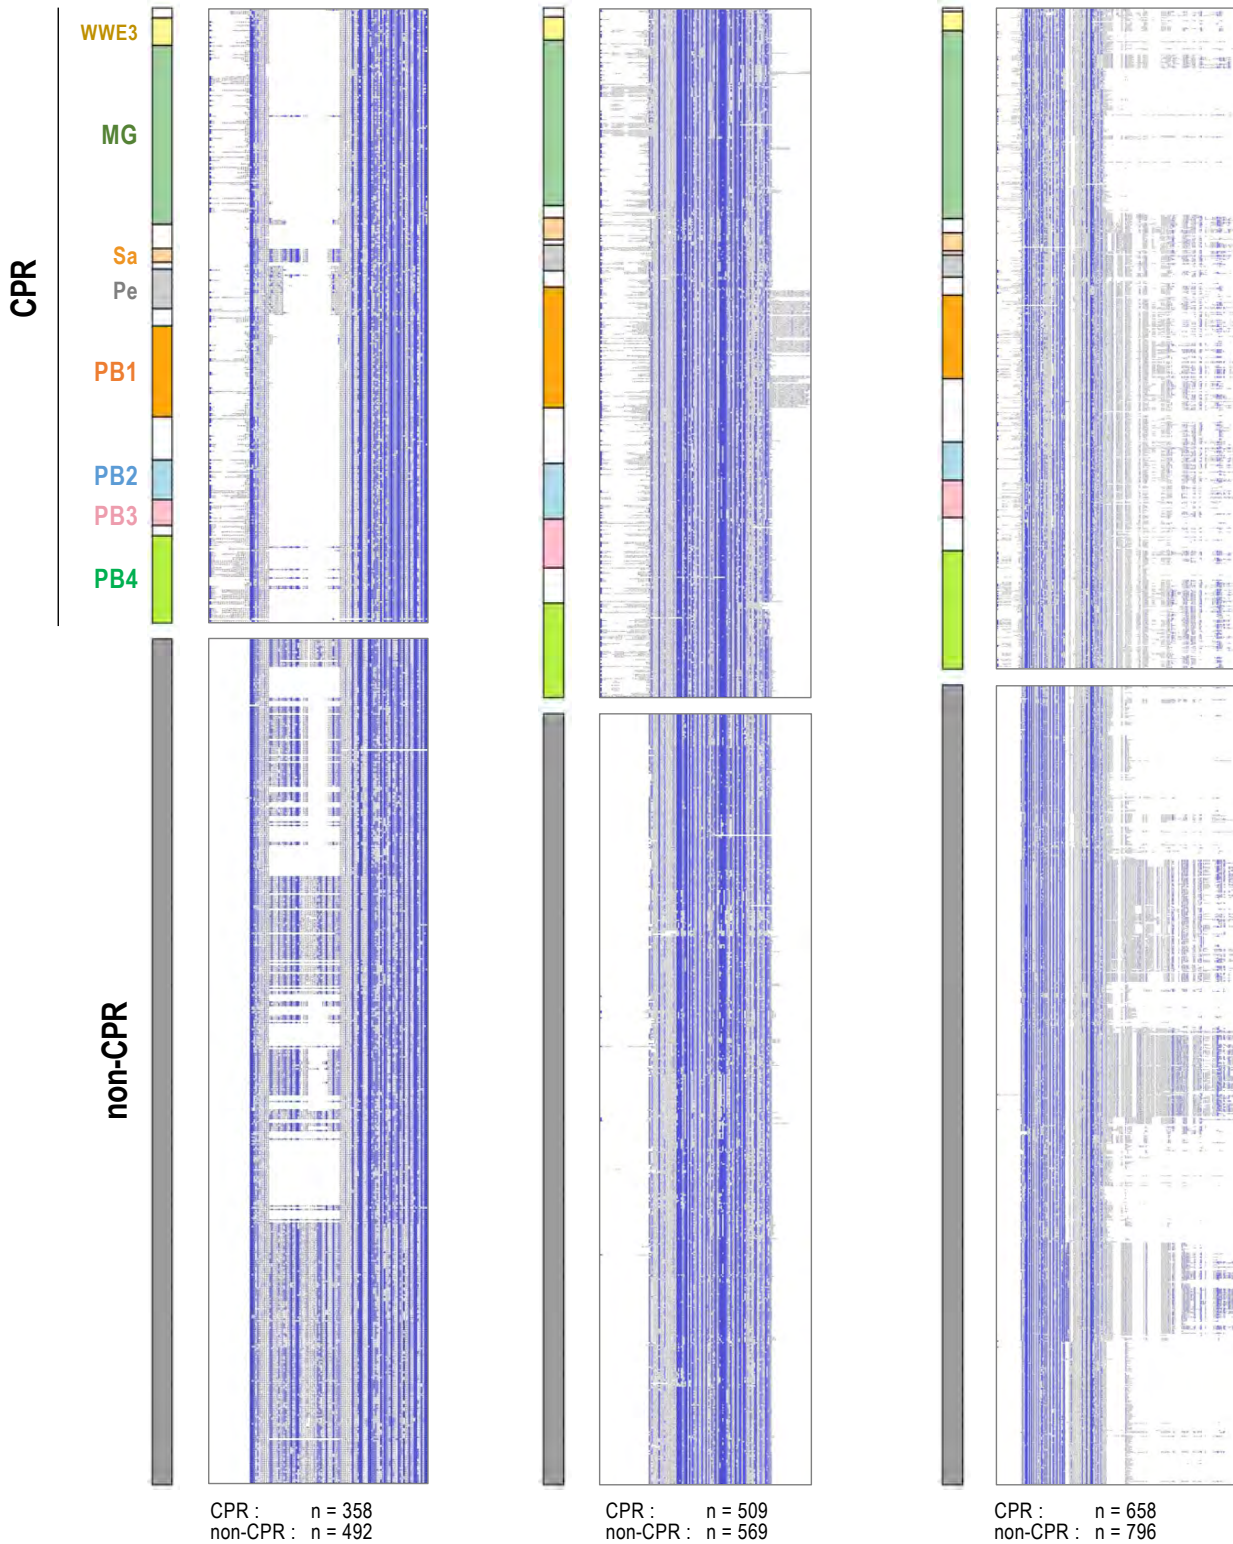

# uS17

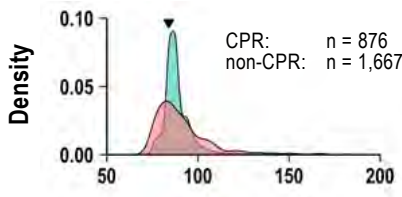

# bS18

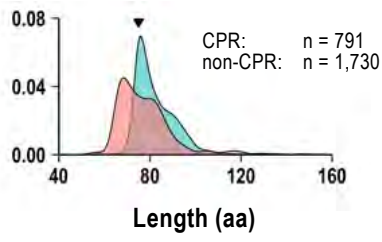

# bS20

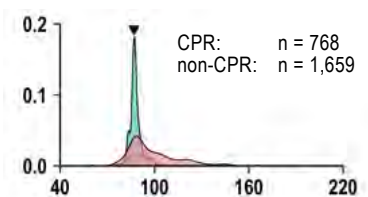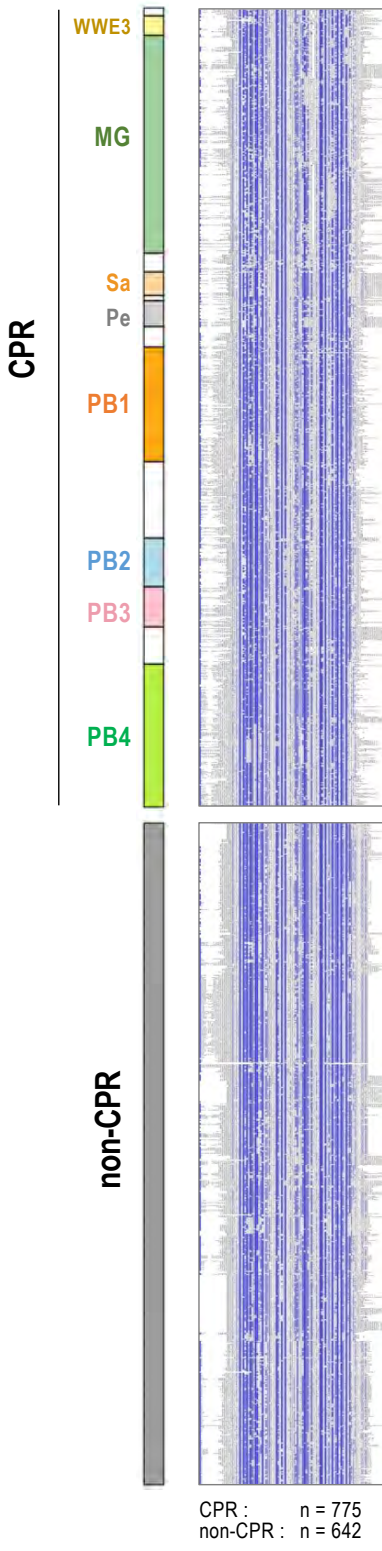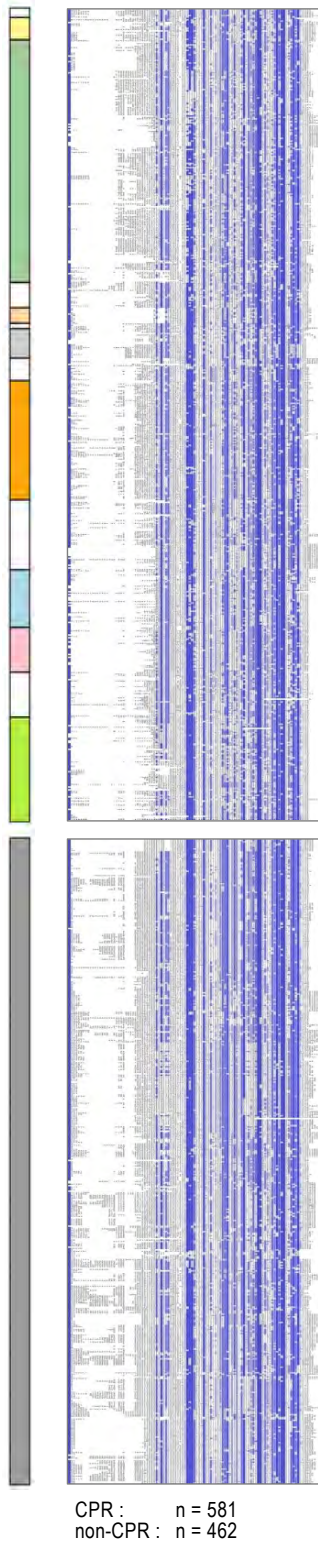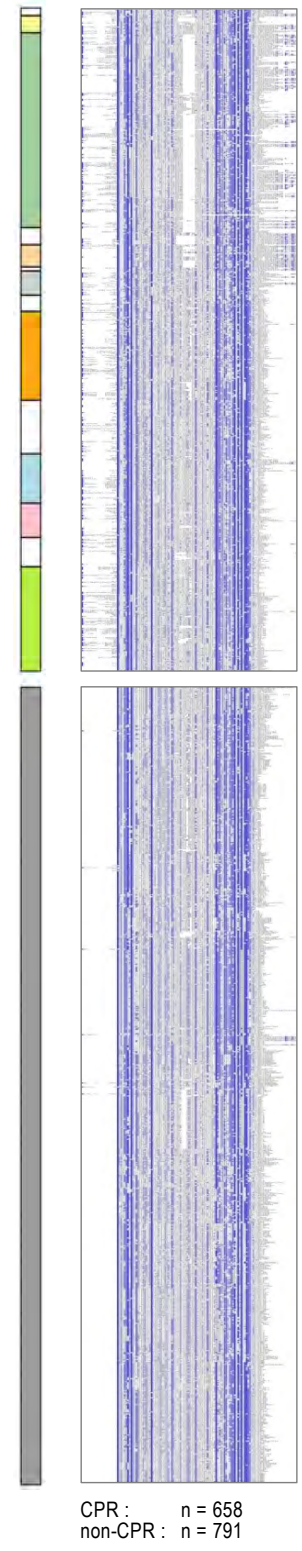

## bS21

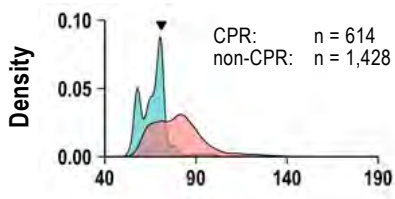

## uL2

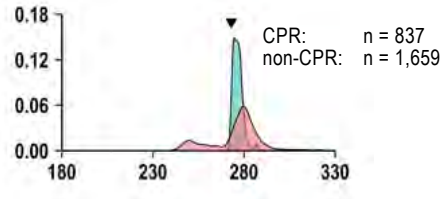

## uL3

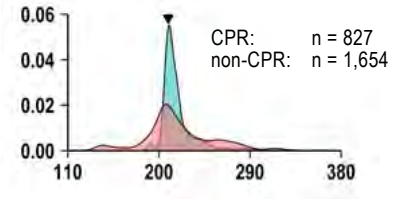

Length (aa)

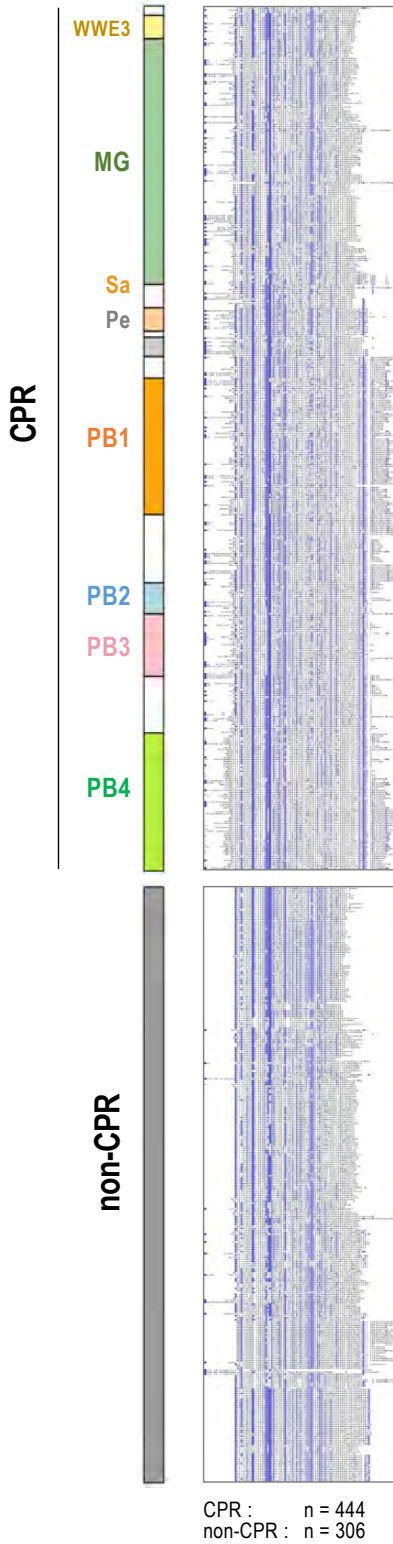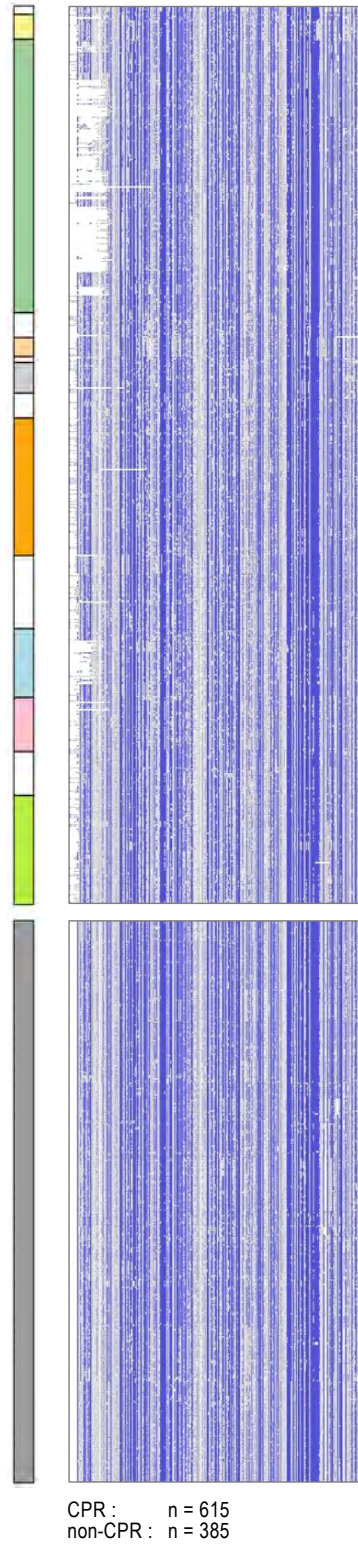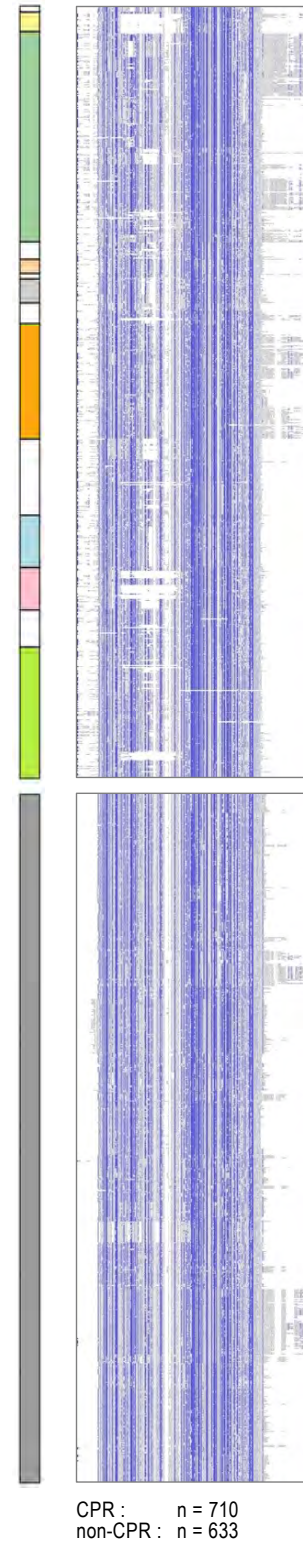



### uL4

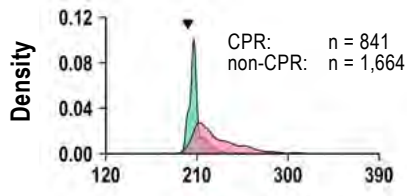

### uL5

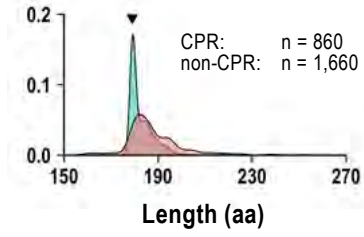

### uL6

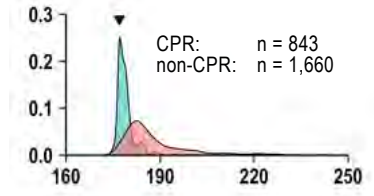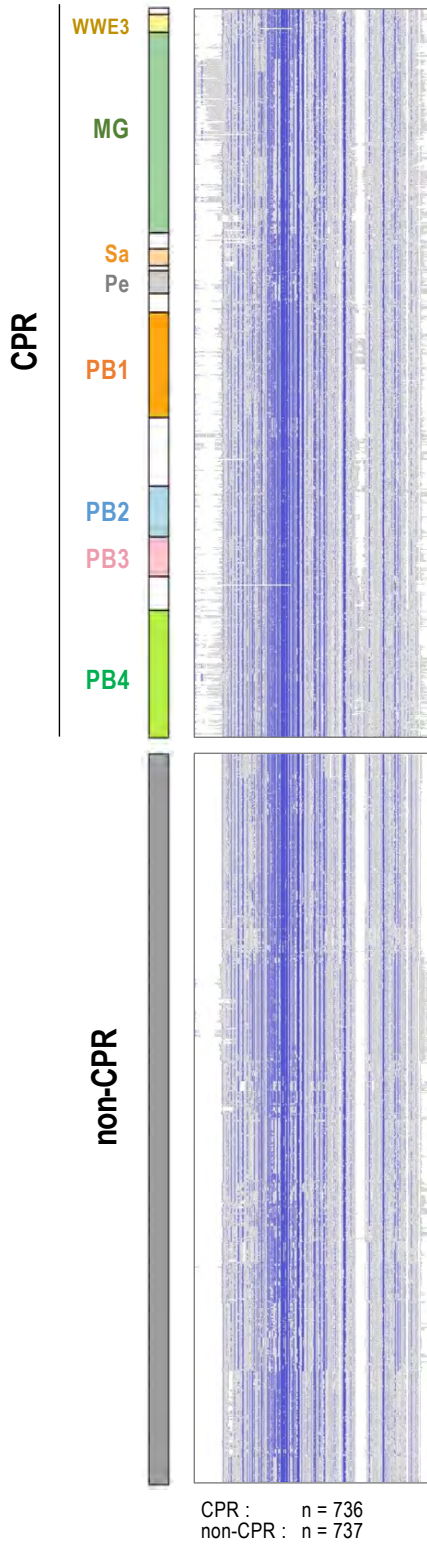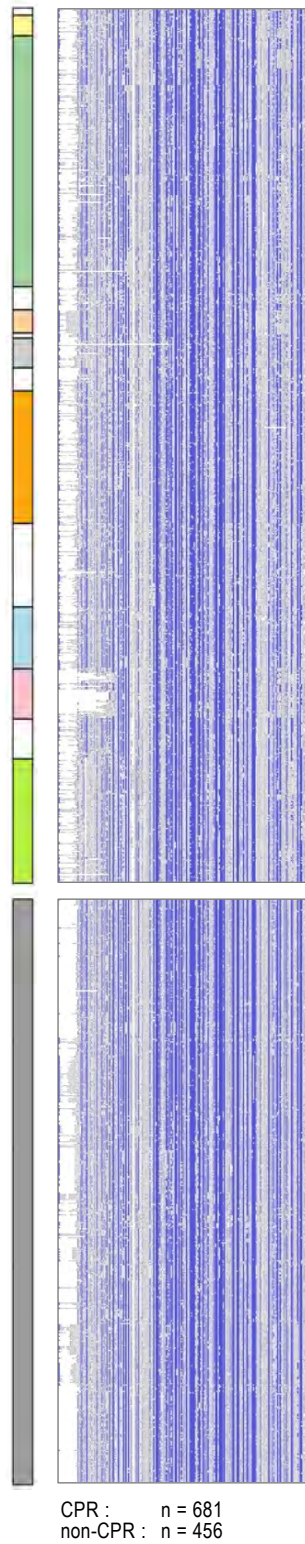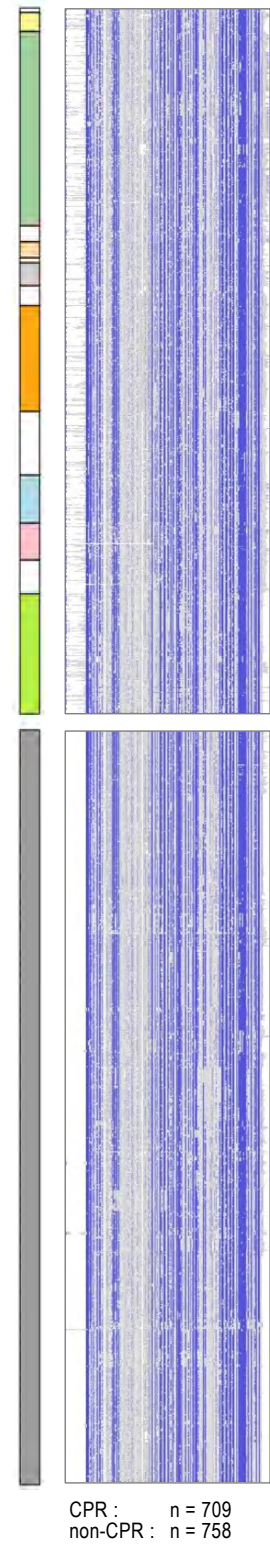

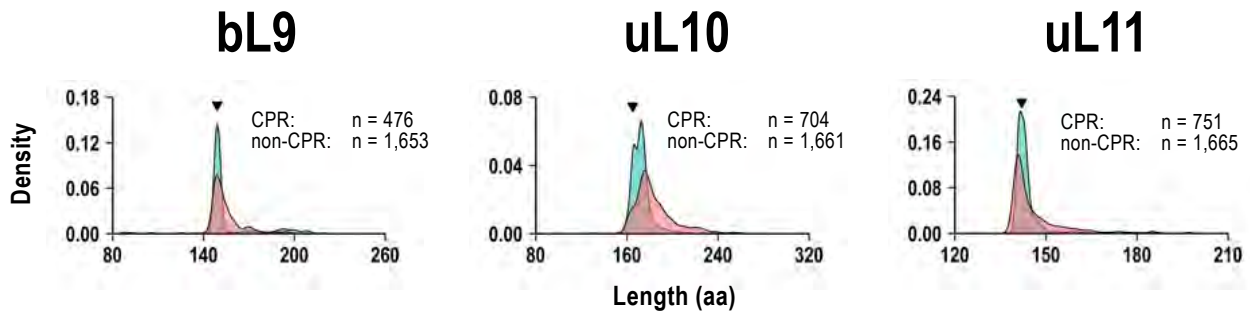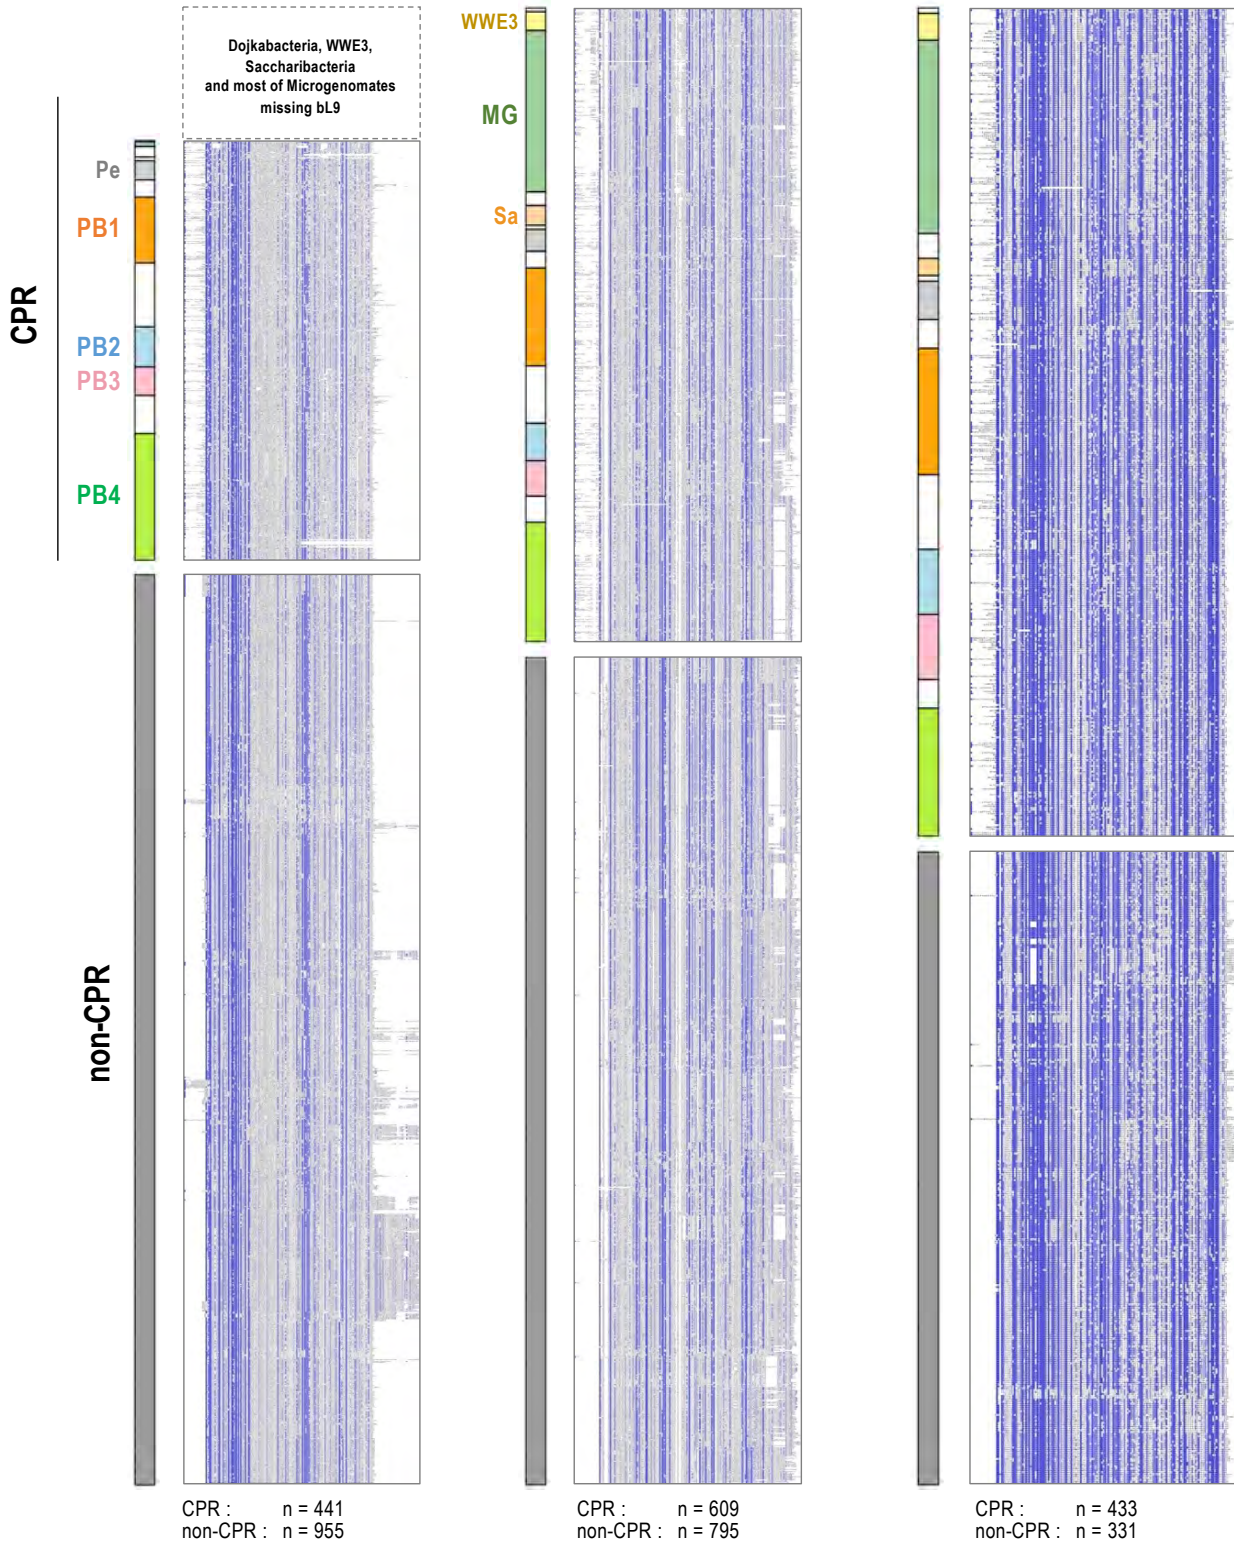

## bL12

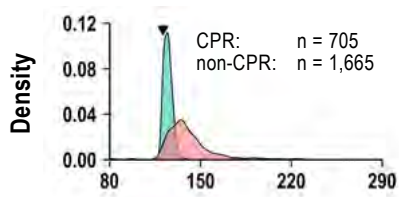

## uL14

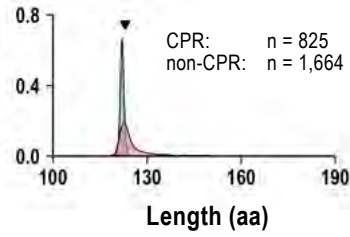

## uL15

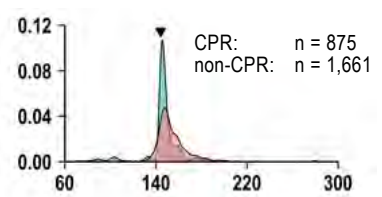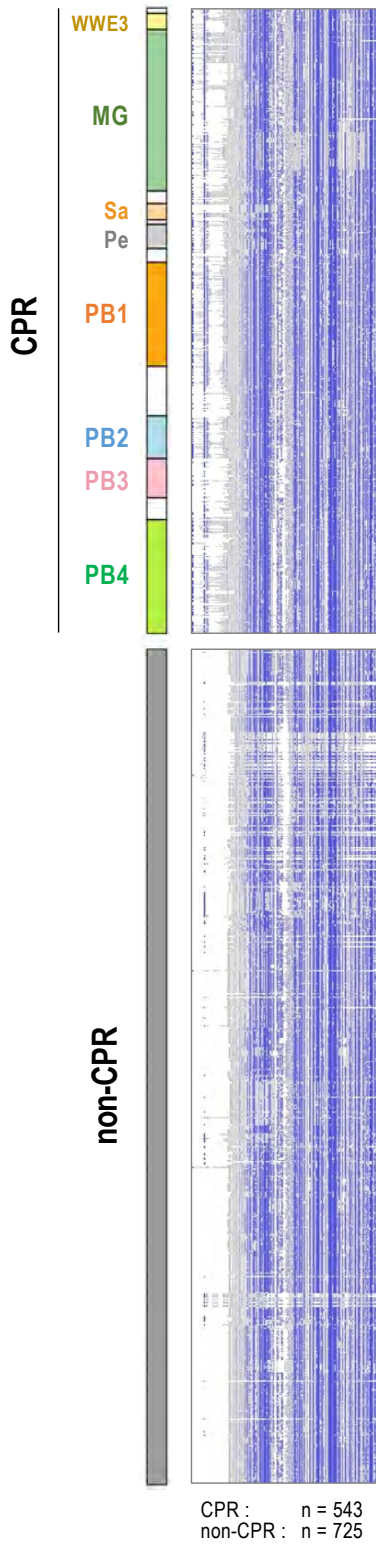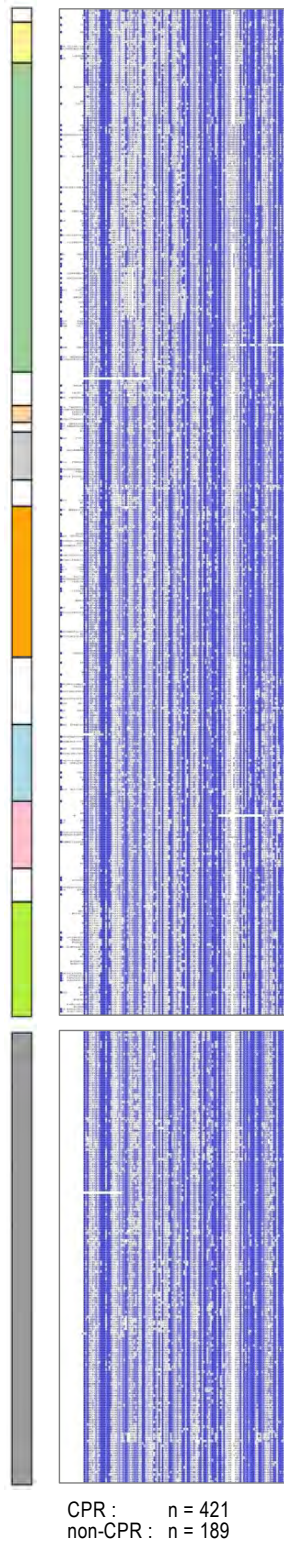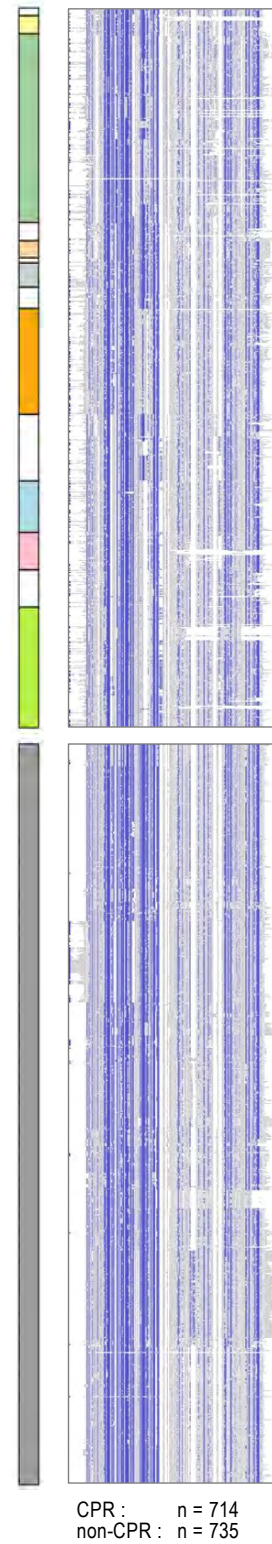

# uL16

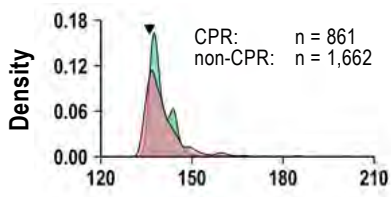

# bL17

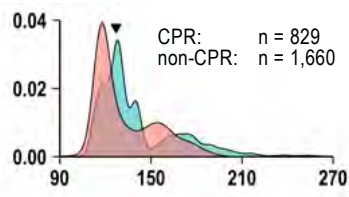

# uL18

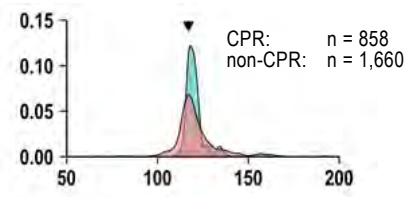

Length (aa)

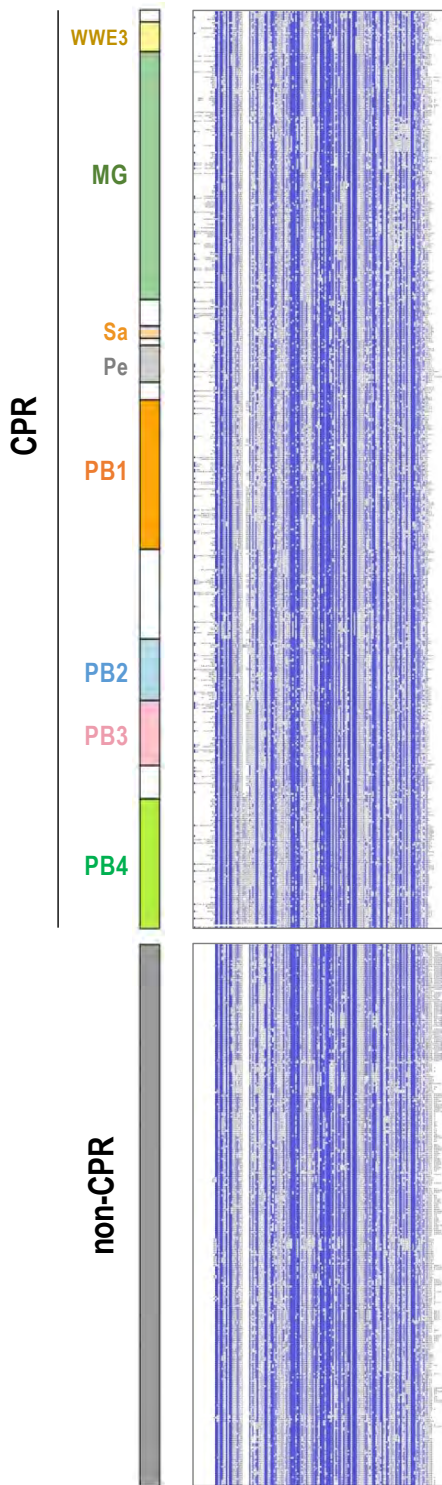

CPR : n = 528  
non-CPR : n = 309

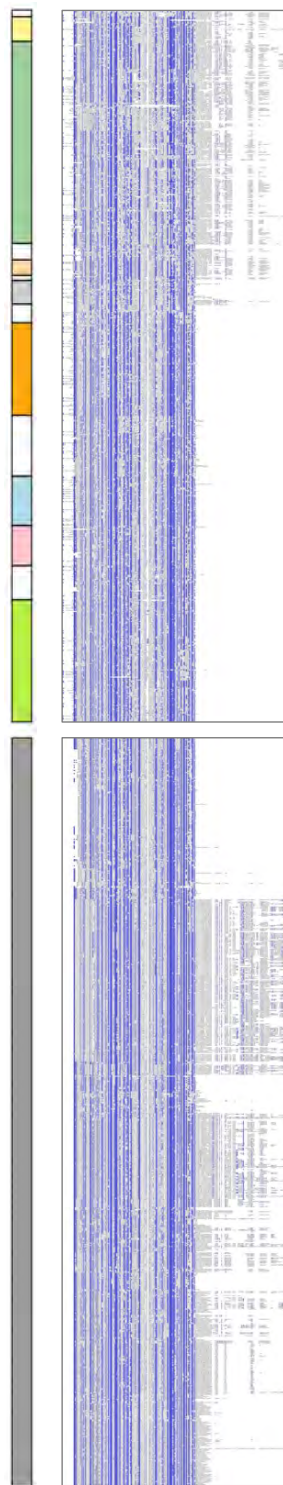

CPR : n = 692  
non-CPR : n = 728

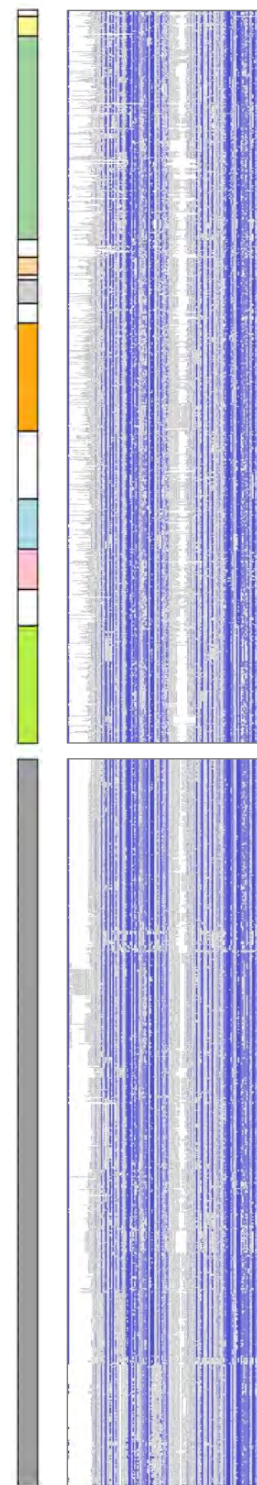

CPR : n = 747  
non-CPR : n = 741

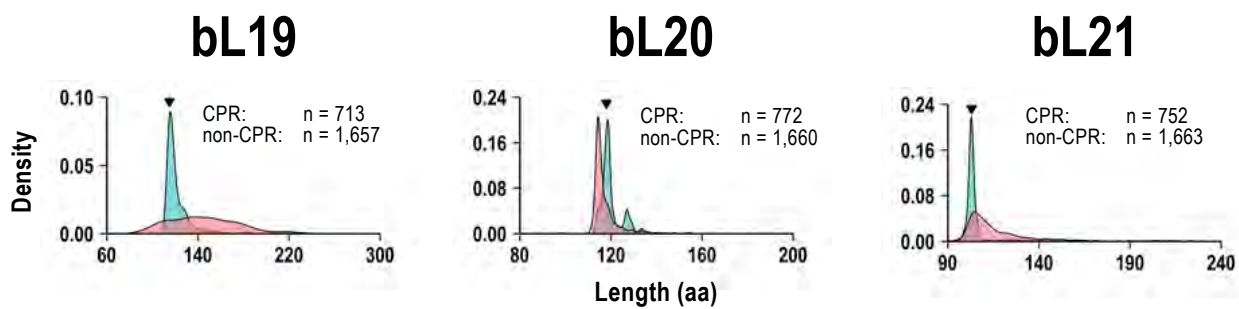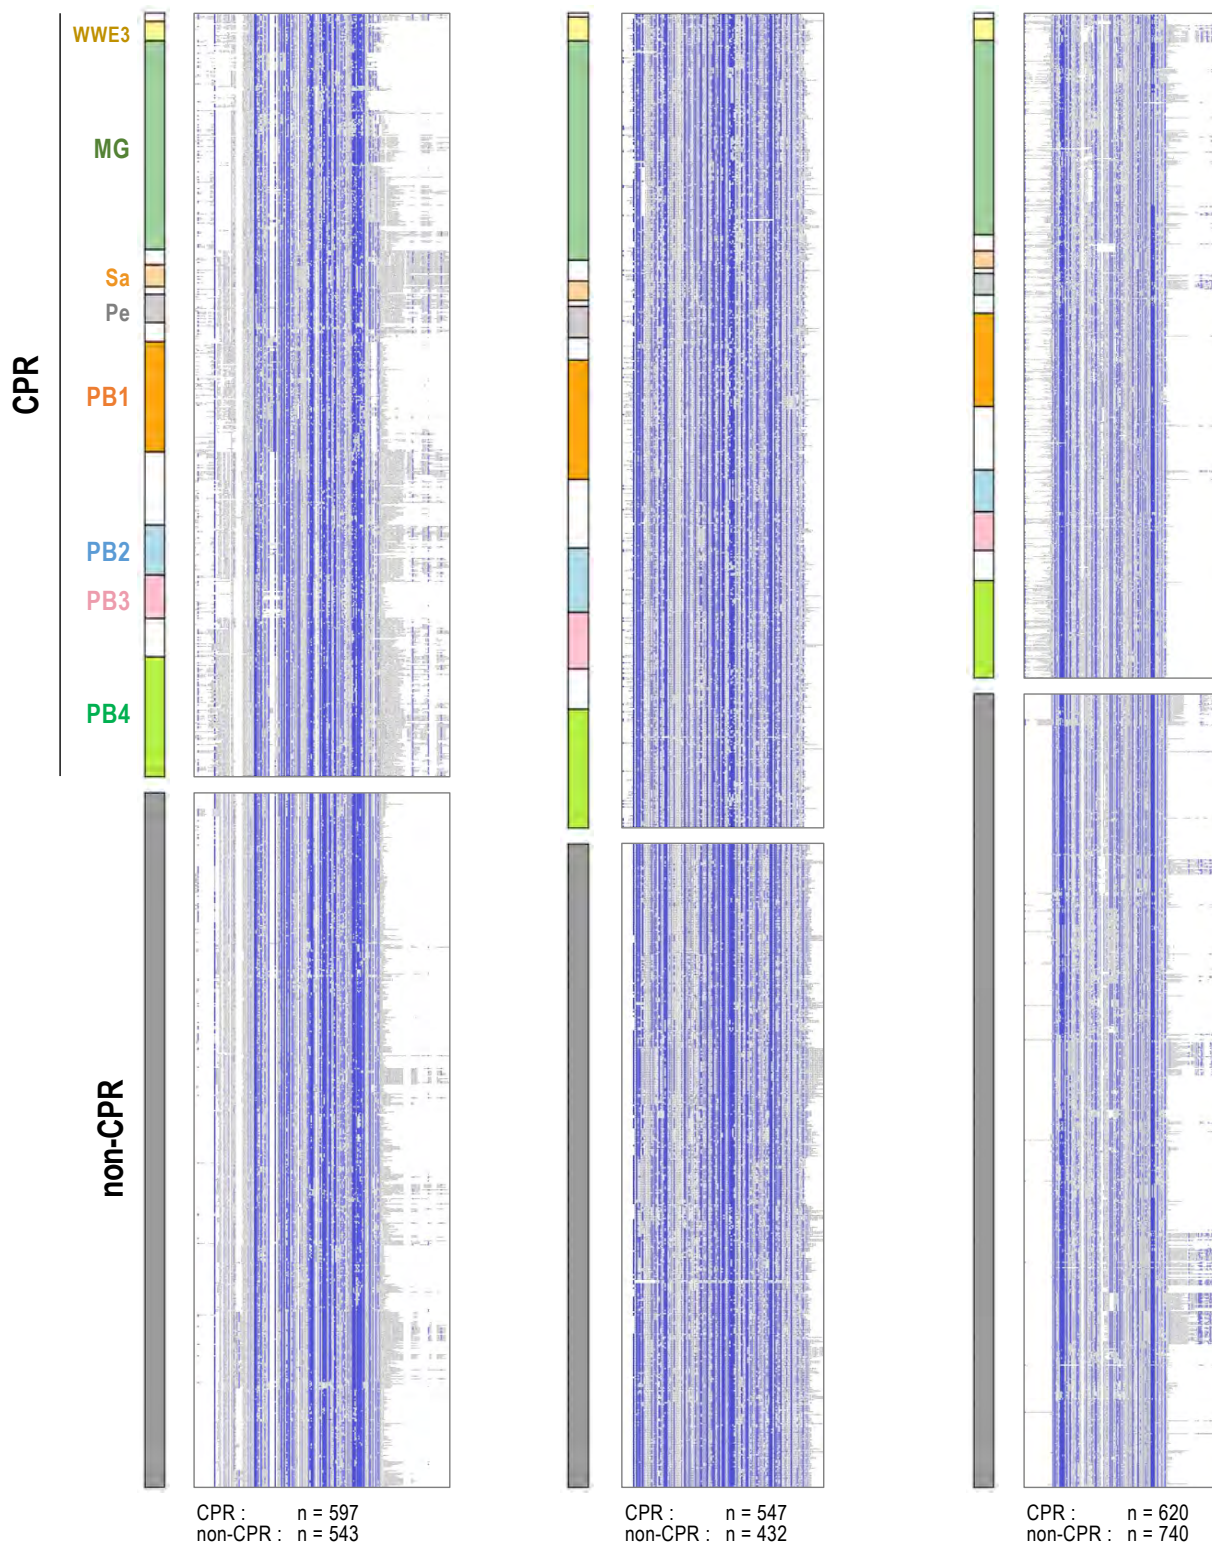

## uL22

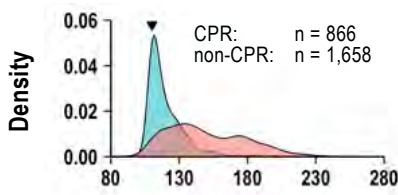

## uL23

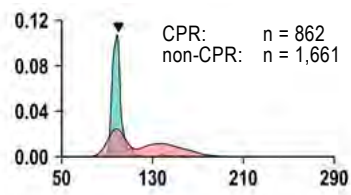

## uL24

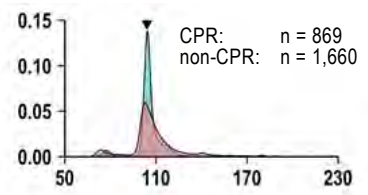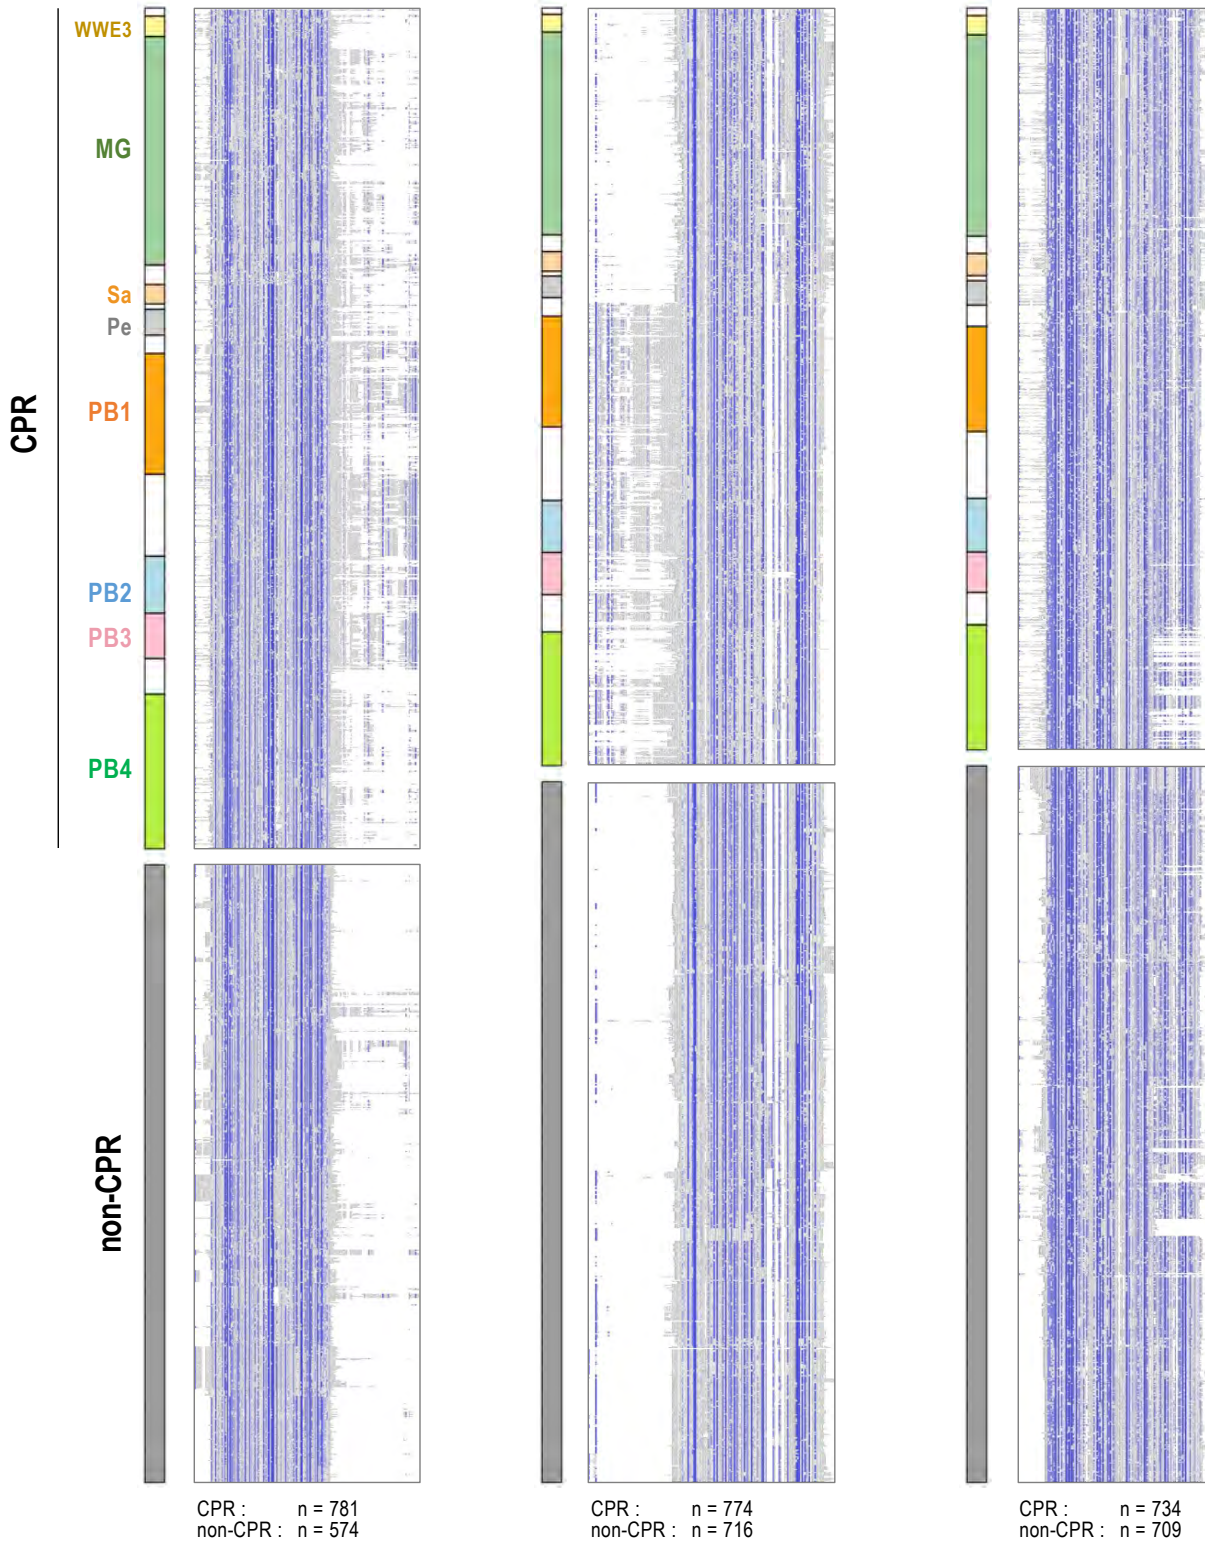

## bL25

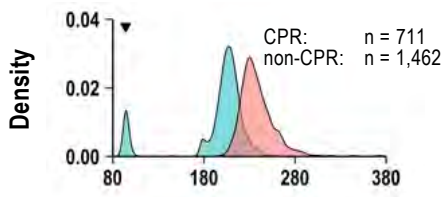

## bL27

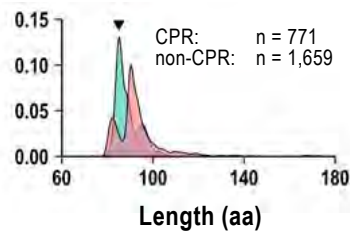

## bL28

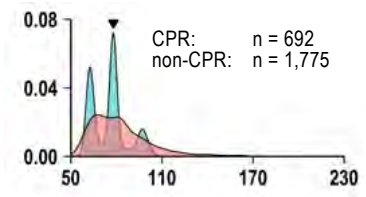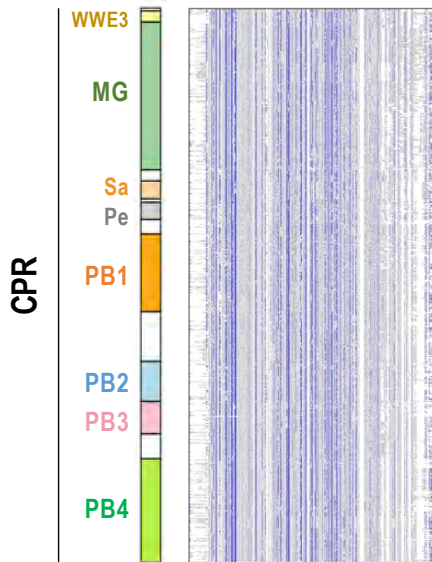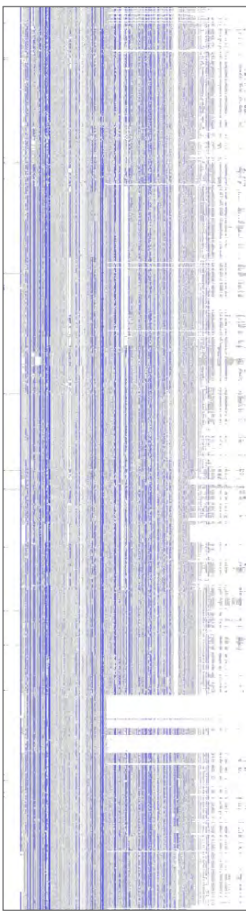

CPR : n = 650  
non-CPR : n = 1059

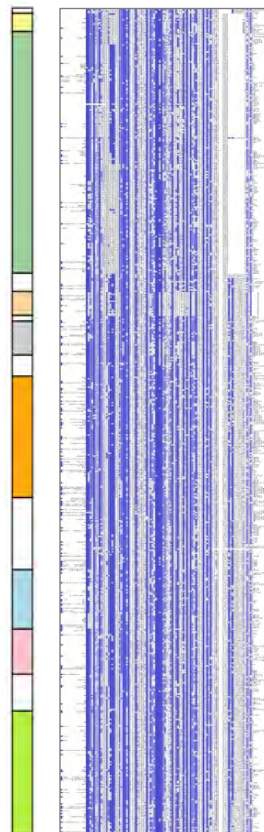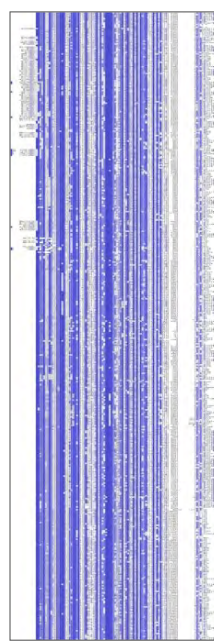

CPR : n = 588  
non-CPR : n = 446

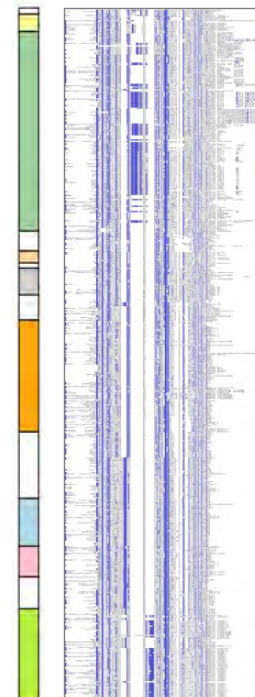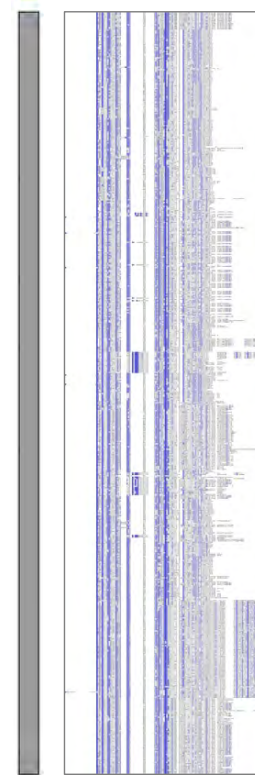

CPR : n = 524  
non-CPR : n = 574

## uL29

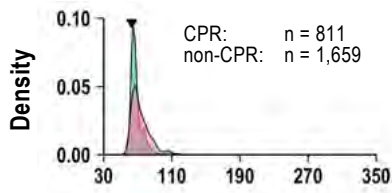

## bL31

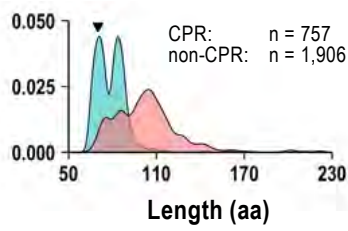

## bL32

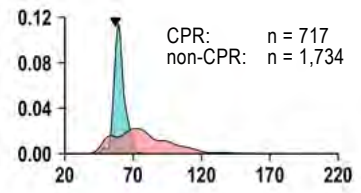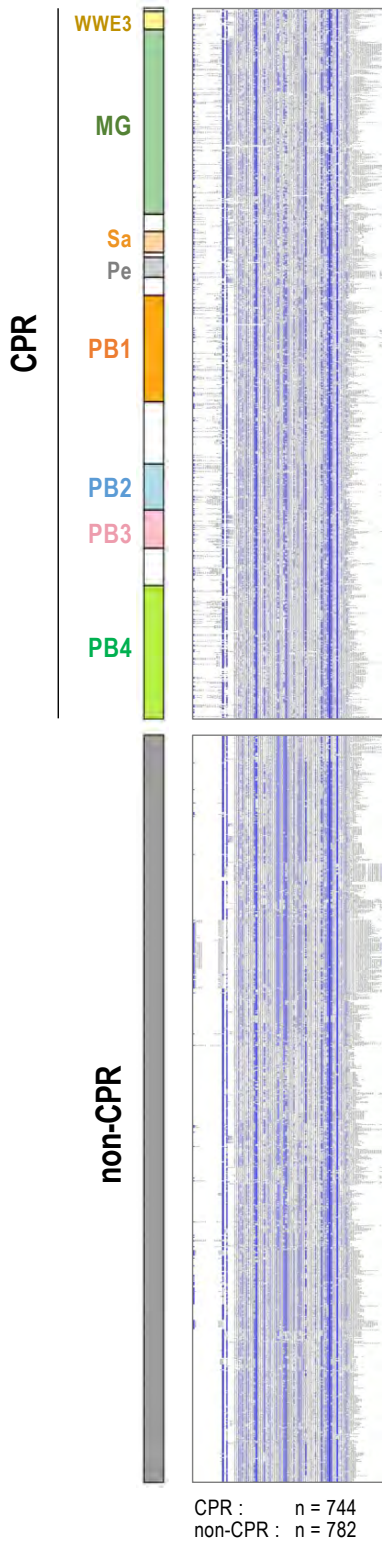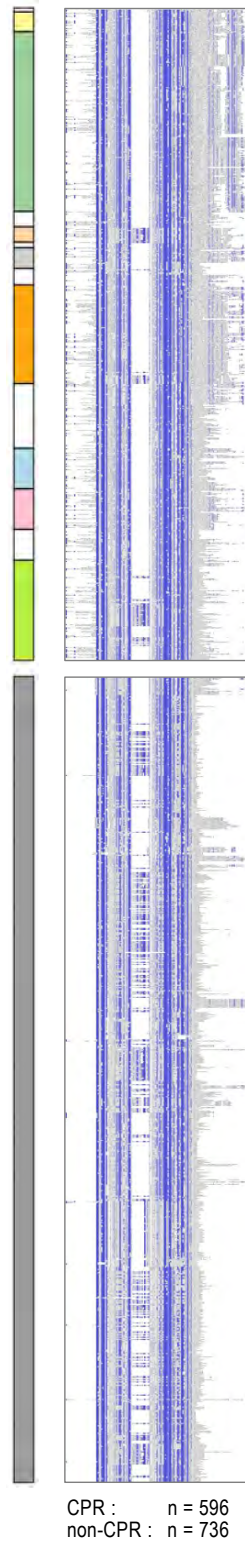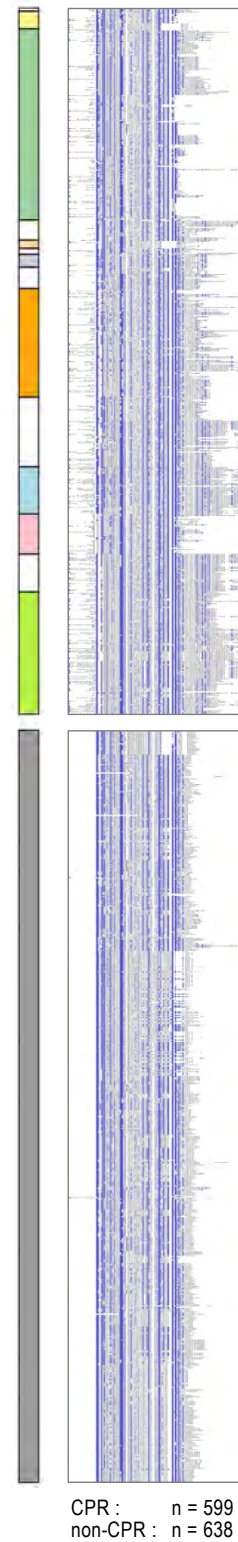



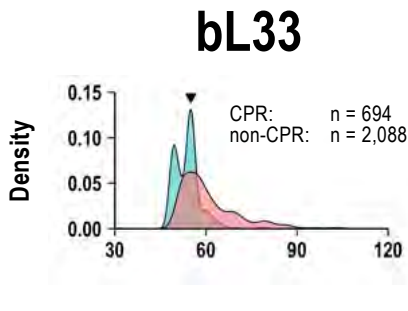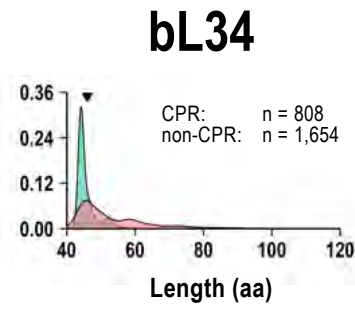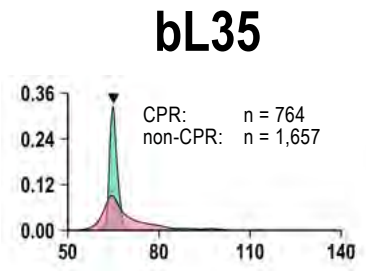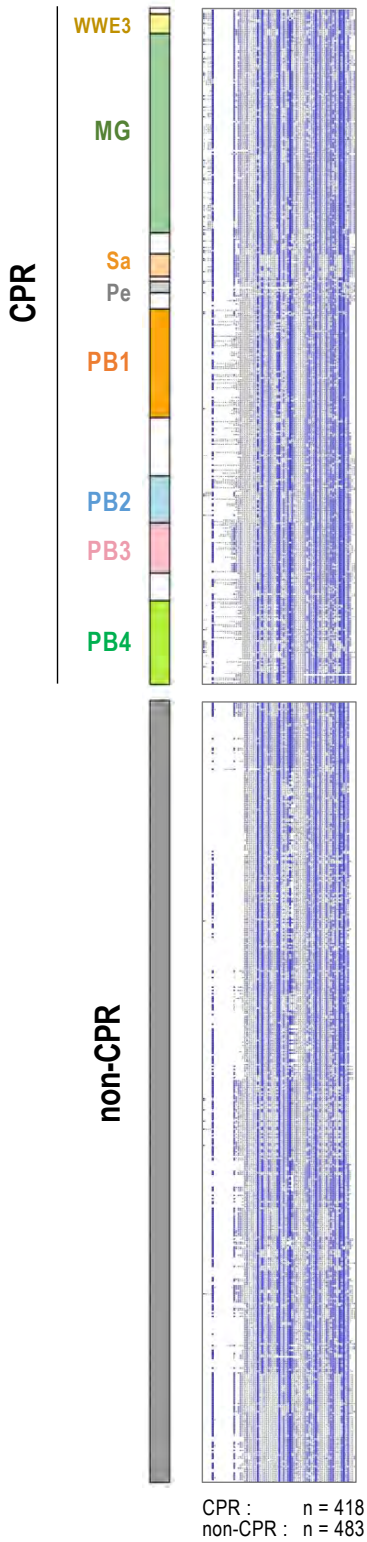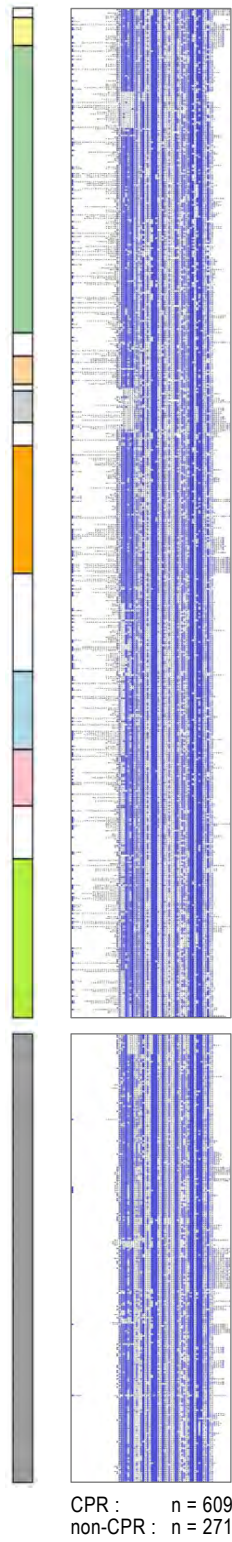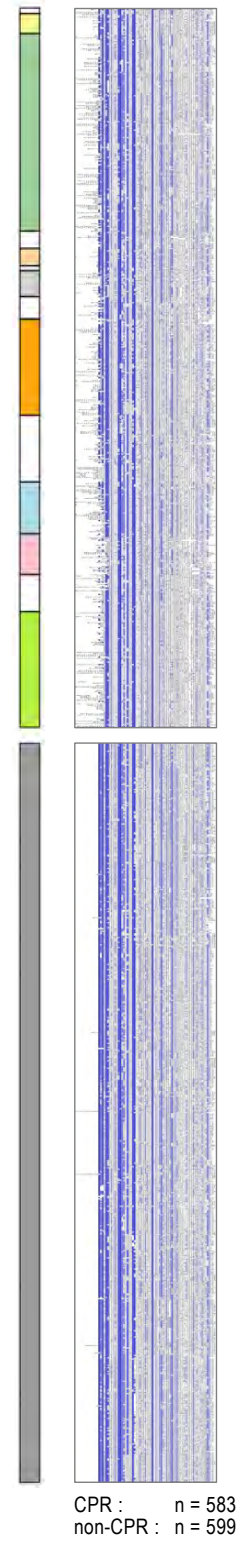

# bL36

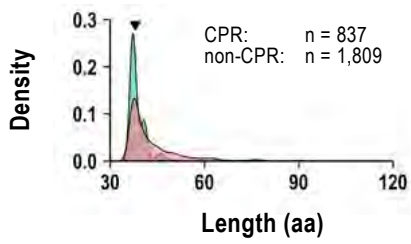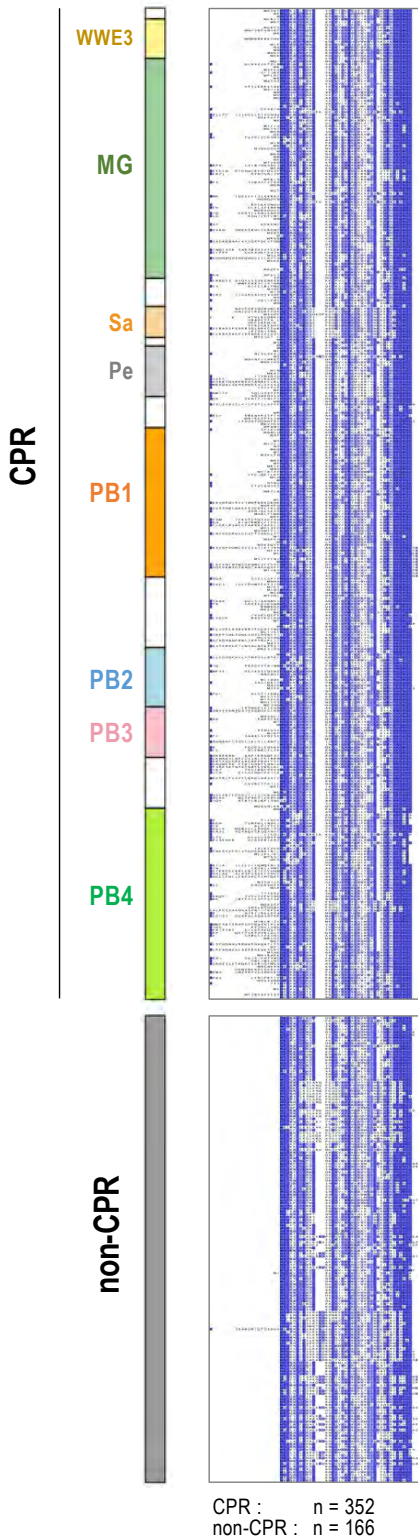

**Supplementary Figure S4. Amino acid sequence alignments of another 50 ribosomal proteins (completion of Figure 3).** Density curves in the top panel show the distributions of ORF lengths (CPR, light red; non-CPR, light blue). See Figure 3 legend for details. Aligned sequences are ordered based on their phylogenetic relationships (Jaffe et al. 2020).

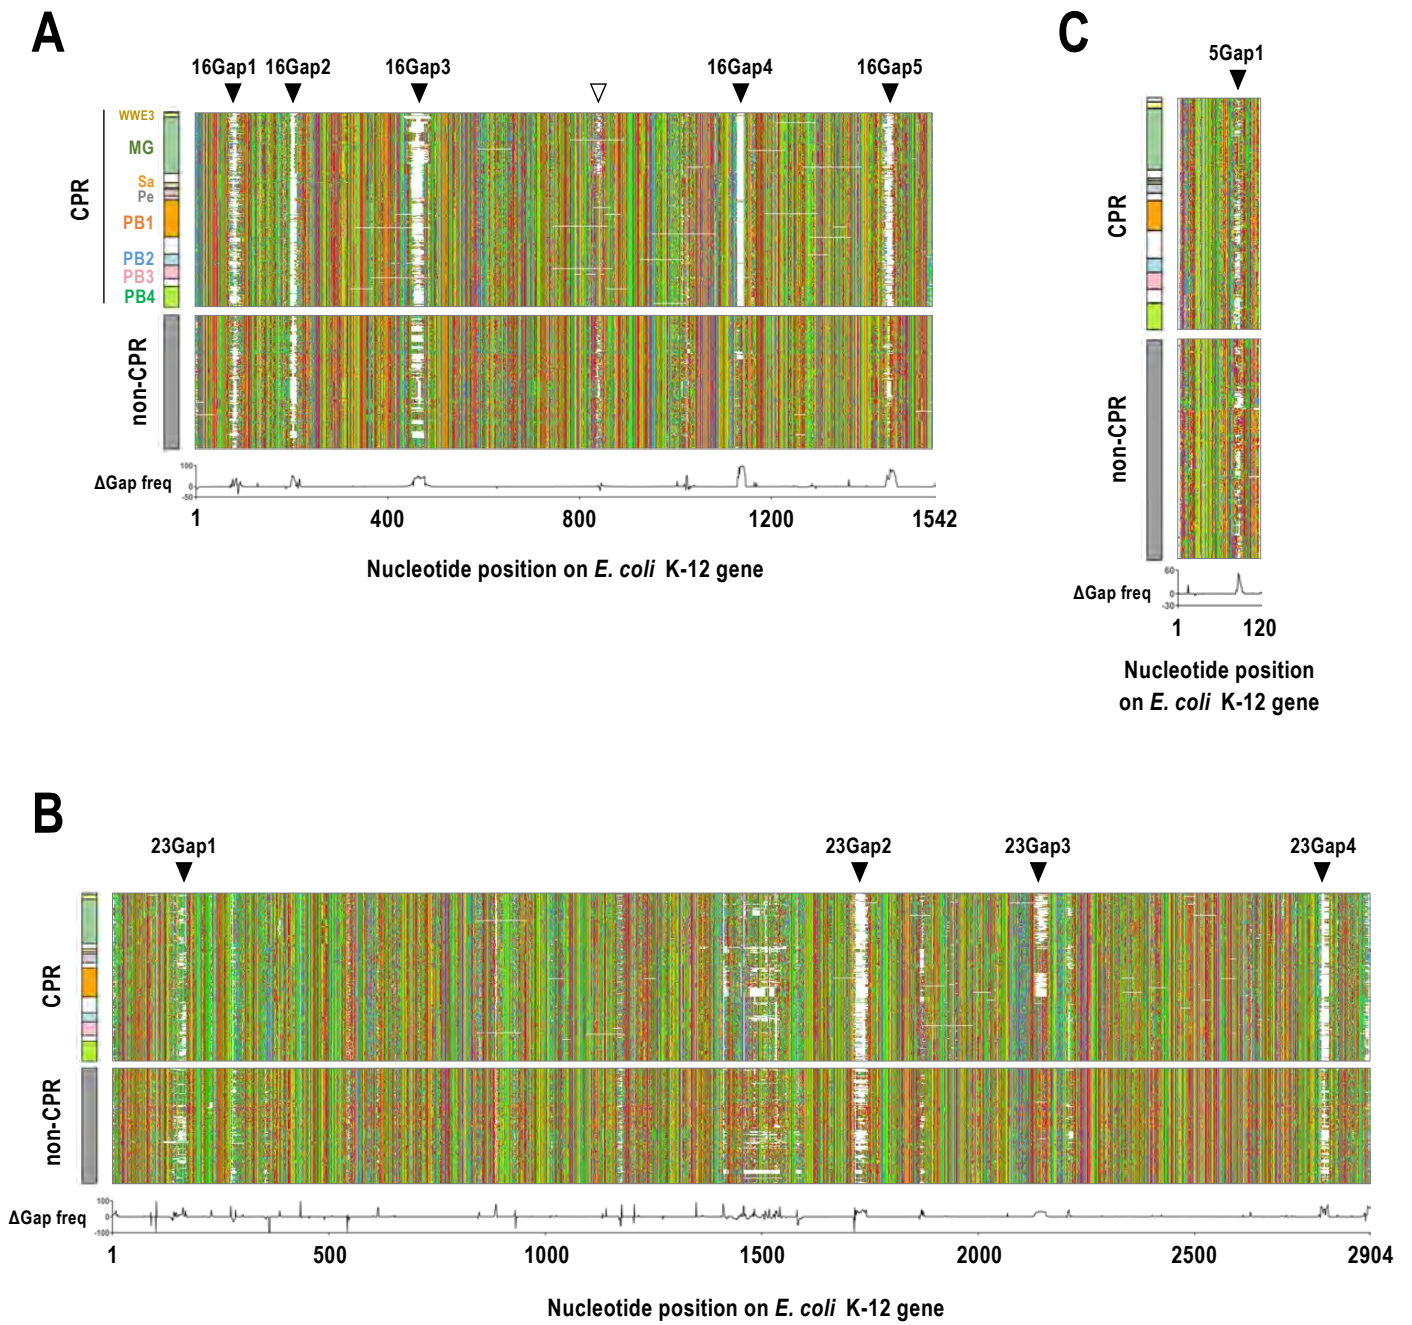

## Supplementary Figure S5

The legend for this figure is placed on the next page.

**Supplementary Figure S5. Nucleotide sequence alignment of the three types of rRNA genes in CPR and non-CPR bacteria.** Multiple alignments of (A) 16S, (B) 23S, and (C) 5S rRNA gene sequences from CPR and non-CPR bacterial genomes. Gene sequences of each type of rRNA (16S, 23S, and 5S) are clustered by sequence identity, and representative sequences for 16S (CPR: n = 278; non-CPR, n = 191), 23S (CPR, n = 256; non-CPR, n = 176), and 5S rRNA genes (CPR, n = 250; non-CPR, n = 237) were aligned with MAFFT (L-INS-i algorithm). Insertion sequences with respect to the *Escherichia coli* K-12 genes were removed. Aligned sequences are shown in the order based largely on the phylogenetic relationships (Jaffe et al. 2020).  $\Delta$ Gap frequency ( $\Delta$ Gap freq.) is defined as follows: (gap frequency in CPR bacteria) – (gap frequency in non-CPR bacteria).  $\Delta$ Gap freq. at each site was calculated based on all the sequences before clustering and is shown at the bottom. Black inverted triangles at the top of each alignment indicate regions with higher  $\Delta$ Gap freq. values. A white inverted triangle indicates a region highly conserved in CPR bacteria. Bases are colored as follows: adenine (A), light green; thymine (T), blue; guanine (G), red; cytosine (C), orange. Panels on the left side of the alignment are colored according to the taxonomic group of each sequence (see Supplementary Figure S1). MG: Microgenomates; Sa: Saccharibacteria; Pe: Peregrinibacteria; PB: Parcubacteria.



**Supplementary Figure S6. Mapping the lost rRNA regions and lost ribosomal protein-binding regions in CPR bacteria to 2D *Escherichia coli* ribosomal structures (supplementary analysis of Figure 6).** The regions were mapped with the RiboVision2 server (<http://apollo.chemistry.gatech.edu/RiboVision2/>) (Bernier *et al.* 2014), based on *E. coli* ribosome structure data (PDB ID: 4V9D). Ribonucleotides contacting the ribosomal proteins bS21, bL9, bL25, bL28, uL29, uL30, bL32, and bL33, which are lost in all or some CPR bacteria, are shown with green circles on the secondary structures of *E. coli* rRNAs. The approximate binding regions on the rRNAs for each ribosomal protein are surrounded by a broken line. The rRNA regions lacking in CPR bacteria (see Figure 5) are highlighted with red circles.

## References

Jaffe AL, Castelle CJ, Matheus Carnevali PB, Gribaldo S, Banfield JF. 2020. The rise of diversity in metabolic platforms across the Candidate Phyla Radiation. *BMC Biol* **18**:1–15.

Bernier CR., Petrov AS, Waterbury CC, Jett J, Li F, Freil LE, Xiong X, Wang L, Migliozzi BLR, Hershkovits E, Xue Y, Hsiao C, Bowman JC, Harvey SC, Grover MA, Wartell ZJ, Williams LD. 2014. RiboVision Suite for Visualization and Analysis of Ribosomes. *Faraday Discussions* **169**(1):195-207.
